# Supplementary material for: Making an inverted Keggin ion lacunary
Source: Royal Society of Chemistry journal article supplement (doi:10.1039/d4sc04634j), 2024-01-01
Supplement: d4sc04634j1.pdf [file d4sc04634j1.pdf]

## Supporting Information

### Making the Inverted Keggin Ion Lacunary

Lu-Lu Liu,<sup>[a]</sup> Zi-Yu Xu,<sup>[a]</sup> Peng Yi,<sup>[a]</sup> Chao-Qin Chen,<sup>[a]</sup> Zhong-Ling Lang,<sup>[b]\*</sup> and Peng Yang<sup>[a]\*</sup>

- a** College of Chemistry and Chemical Engineering  
Advanced Catalytic Engineering Research Center of the Ministry of Education  
Hunan University, Changsha 410082, P. R. China
- b** Key Laboratory of Polyoxometalate and Reticular Material Chemistry of Ministry of Education  
Faculty of Chemistry  
Northeast Normal University, Changchun 130024, P. R. China

#### Corresponding Author

\*E-mail: [pengyang216@hnu.edu.cn](mailto:pengyang216@hnu.edu.cn) (P.Y.)

\*E-mail: [langzl554@nenu.edu.cn](mailto:langzl554@nenu.edu.cn) (Z.-L.L.)

## Table of Contents (31 pages)

|                                   |     |
|-----------------------------------|-----|
| 1. Experimental Details           | S2  |
| 2. Synthesis of Compounds         | S4  |
| 3. Characterizations on Compounds | S5  |
| 4. References                     | S31 |

# 1. Experimental Details

## 1.1 Materials

Unless otherwise indicated, all chemicals and reagents were purchased from commercial suppliers and used without further purification.

## 1.2 Physical measurements

**FT-IR.** The Fourier transform infrared (FT-IR) spectra were recorded on KBr disk using a Shimadzu IRSpirit-T spectrometer between 400 and 4000  $\text{cm}^{-1}$ .

**Elemental Analyses.** CHN microanalyses were performed on a Perkin-Elmer 240C elemental analyzer, and ICP-OES analyses were performed on a Perkin-Elmer Optima 8300 optical emission spectrometer.

**NMR.** The  $^1\text{H}$  and  $^{13}\text{C}$  nuclear magnetic resonance (NMR) spectra were recorded on a Bruker Avance III 400 MHz instrument at room temperature, using 5-mm tubes for  $^1\text{H}$  and  $^{13}\text{C}$  with respective resonance frequencies of 399.78 MHz ( $^1\text{H}$ ) and 100.71 MHz ( $^{13}\text{C}$ ).

**TGA.** Thermogravimetric analyses (TGA) were carried out on a TA Instruments SDT Q600 thermobalance with a 100  $\text{mL min}^{-1}$  flow of nitrogen; the temperature was ramped from 25 to 800  $^{\circ}\text{C}$  at a rate of 5  $^{\circ}\text{C min}^{-1}$ .

**ESI-MS.** The electrospray-ionization mass spectrometry (ESI-MS) measurements were made in the negative ion mode on an Agilent 6520 Q-TOF LC/MS mass spectrometer coupled to an Agilent 1200 LC system, and all the MS data were processed by the MassHunter Workstation software. Sample solutions were ca.  $10^{-5}$  M in water and were transferred to the electrospray source by direct injection.

**Powder XRD.** Powder X-ray diffraction (Powder XRD) patterns were obtained using a Bruker D8 ADVANCE diffractometer with Cu  $K\alpha$  radiation ( $\lambda = 1.54056 \text{ \AA}$ ).

**XPS.** For X-ray photoelectron spectroscopy (XPS), a 100-nm-thick Ag film was deposited by sputter-coating on a silicon substrate. The samples were then dispersed in acetone and drop-casted on the Ag coated silicon substrate. After sample preparation, they were introduced into the XPS vacuum chamber equipped with a photoelectron spectrometer consisting of a hemispherical analyzer (Spec Phoebos 100) and a Mg/Al X-ray source (Spec XR-50). For excitation, the Mg  $K\alpha$  ( $E = 1253.6 \text{ eV}$ ) anode was used. The shift in the binding energy due to surface charging was corrected with respect to the C 1s peak. The data evaluation was done by CASAXPS software.

**EDX.** Energy dispersive X-Ray (EDX) spectra were acquired on a JEM-2100Plus instrument.

**UV-vis Absorption.** The ultraviolet-visible (UV-vis) absorption spectra were measured at room temperature using a Shimadzu UV-1900i spectrophotometer.

**SEM.** Scanning electron microscopy (SEM) images were acquired on a Hitachi Regulus 8100 instrument.

**Nitrogen Adsorption-Desorption Isotherm.** Nitrogen physisorption isotherms were measured at 77 K using BSD-660M A6B6M apparatus to determine the Brunauer–Emmett–Teller (BET) surface area.

The samples were pre-degassed at 343 K under vacuum for 14 h.

**X-ray Crystallography.** Single crystals of the three compounds were mounted in a Hampton cryoloop with light oil to prevent efflorescence. The data collections for these compounds were performed at 150 K on a Bruker D8 Quest single-crystal diffractometer equipped with Mo  $K\alpha$  radiation ( $\lambda = 0.71073 \text{ \AA}$ ). All structures were solved with the ShelXT structure solution program using Intrinsic Phasing<sup>S1</sup> and refined with the ShelXL refinement package using Least Squares minimization<sup>S2</sup> operated in the OLEX2 interface.<sup>S3</sup> All non-hydrogen atoms were refined anisotropically. The hydrogen atoms of the organic groups were introduced in geometrically calculated positions. It was not possible to locate all counter cations by X-ray diffraction, probably due to crystallographic disorder, which is a common problem in polyoxometalate crystallography. Thus, the SQUEEZE program<sup>S4</sup> or the Olex2 solvent mask function were further used to remove the contributions of weak reflections from the whole data. The newly generated hkl data were further used to refine the final crystal data. Therefore, the exact number of cations and solvent molecules was determined by elemental analysis and thermogravimetric diagrams. The resulting formula units were further used throughout the paper. In the Supporting Information, the crystal data and structure refinement for the three compounds is summarized in Table S7. CCDC-2367552 (**SeAs<sub>3</sub>Mo<sub>10</sub>**), CCDC-2367554 (**Se<sub>2</sub>As<sub>2</sub>Mo<sub>10</sub>**), and CCDC- 2367553 (**Se<sub>2</sub>As<sub>6</sub>Mo<sub>20</sub>Ce<sub>2</sub>**) contain the supplementary crystallographic data for this paper. These data can be obtained free of charge from The Cambridge Crystallographic Data Center via [www.ccdc.cam.ac.uk/data\\_request/cif](http://www.ccdc.cam.ac.uk/data_request/cif).

**Basic Procedure of the Condensation-Cyclization Reaction.** Hydrazine (0.2 mmol), 1,3-diketone (0.2 mmol), catalyst (1.5 mol%), and DMC (dimethyl carbonate, 0.5 mL) were added to a 5-mL reaction vial with a Teflon screw cap. Then the reaction was carried out at varying temperature and time. After the reaction was complete, the mixture was purified by column chromatography on silica gel (200-300 mesh) using petroleum ether (60-90 °C) and ethyl acetate to obtain the desired products.

**Basic Procedure of the Acetalization Reaction.** 2-aminobenzamide (0.2 mmol), benzaldehyde (0.2 mmol), catalyst (1.5 mol%), and acetonitrile (1.0 mL) were added to a 5-mL reaction vial with a Teflon screw cap. Then the reaction was carried out at 80 °C and different reaction time. After the reaction was complete, the mixture was purified by column chromatography on silica gel (200-300 mesh) using petroleum ether (60-90 °C) and ethyl acetate to obtain the desired products.

**DFT computational details:** To qualitatively compare the surface electronic character between the plenary **As<sub>4</sub>Mo<sub>12</sub>** as well as lacunary **SeAs<sub>3</sub>Mo<sub>10</sub>** and **Se<sub>2</sub>As<sub>2</sub>Mo<sub>10</sub>** molecules, the electrostatic potential distribution was computed for the three polyanions with density functional theory method. All calculations were performed through the facilities provided by the Gaussian09 package.<sup>S5</sup> Geometry optimizations were carried out with B3LYP functional, and the LANL2DZ basis set was employed for the Mo atom, whereas the 6-31G (d, p) basis set was used for the H, C, N, Se, As, and O atoms.<sup>S6</sup> The continuum PCM implicit solvation model was used to simulate the effect of the aqueous solution.<sup>S7</sup>

## 2. Synthesis of Compounds

### Synthesis of $(\text{NH}_4)_3[(\text{SeO}_3)(p\text{-H}_3\text{NC}_6\text{H}_4\text{AsO}_3)_3\text{Mo}_{10}\text{O}_{29}]\cdot 15\text{H}_2\text{O}$ ( $\text{SeAs}_3\text{Mo}_{10}$ )

$(\text{NH}_4)_6\text{Mo}_7\text{O}_{24}\cdot 4\text{H}_2\text{O}$  (2.001 g, 1.619 mmol),  $\text{SeO}_2$  (0.201 g, 1.811 mmol), *p*-aminophenylarsonic acid (0.199 g, 0.917 mmol), and glycine (0.200 g, 5.328 mmol) were dissolved in 15 mL of distilled water for 20 min upon stirring. Then, the pH of the above solution was adjusted to 0.9 using HCl (6 M). The mixture was stirred and heated at 90 °C for 2 h, cooled to room temperature and filtered. Slow evaporation of the filtrate in an open vial resulted in block-shaped, dark yellow crystals after two weeks, which were then collected by filtration and air dried. Yield: 0.255 g (33% based on *p*-aminophenylarsonic acid). Elemental analysis (%): Calcd: C 8.57, N 3.33, Se 3.13, As 8.91, Mo 38.03; Found: C 8.14, N 3.51, Se 3.28, As 8.44, Mo 38.56. IR (2% KBr pellet,  $\nu/\text{cm}^{-1}$ ): 3426 (w), 1632 (m), 1419 (m), 1396 (m), 1096 (s), 913 (s), 855 (s), 670 (s), 549 (s).

### Synthesis of $(\text{NH}_4)_4[(\text{SeO}_3)_2(p\text{-H}_3\text{NC}_6\text{H}_4\text{AsO}_3)_2\text{Mo}_{10}\text{O}_{29}]\cdot 11\text{H}_2\text{O}$ ( $\text{Se}_2\text{As}_2\text{Mo}_{10}$ )

$(\text{NH}_4)_6\text{Mo}_7\text{O}_{24}\cdot 4\text{H}_2\text{O}$  (2.001 g, 1.619 mmol),  $\text{SeO}_2$  (0.300 g, 2.750 mmol), and *p*-aminophenylarsonic acid (0.199 g, 0.917 mmol) were dissolved in 15 mL of distilled water for 20 min upon stirring. Then, the pH was adjusted to 1.1 using HCl (6 M). The mixture was stirred and heated at 90 °C for 30 min, cooled to room temperature and filtered. Slow evaporation of the filtrate in an open vial resulted in rod-shaped, colorless crystals after one week, which were then collected by filtration and air dried. Yield: 0.305 g (28% based on *p*-aminophenylarsonic acid). Elemental analysis (%): Calcd: C 6.06, N 3.53, Se 6.64, As 6.30, Mo 40.32; Found: C 5.73, N 3.23, Se 6.36, As 6.44, Mo 39.56. IR (2% KBr pellet,  $\nu/\text{cm}^{-1}$ ): 3430 (w), 3150 (w), 1732 (m), 1625 (m), 1504 (m), 1405 (m), 1133 (m), 1073 (m), 914 (s), 853 (s), 650 (s), 569 (s).

### Synthesis of $[\{\text{Ce}(\text{H}_2\text{O})_6(\text{SeO}_3)(p\text{-H}_3\text{NC}_6\text{H}_4\text{AsO}_3)_3\text{Mo}_{10}\text{O}_{29}\}_2]\cdot 35\text{H}_2\text{O}$ ( $\text{Se}_2\text{As}_6\text{Mo}_{20}\text{Ce}_2$ )

**Precursor Approach:**  $\text{SeAs}_3\text{Mo}_{10}$  (0.252 g, 0.100 mmol) and  $\text{Ce}(\text{NO}_3)_3\cdot 6\text{H}_2\text{O}$  (0.201 g, 0.463 mmol) were dissolved in 15 mL of distilled water for 20 min upon stirring. Then, the pH of the above solution was adjusted to 1.2 using HCl (6 M). The mixture was stirred and heated at 90 °C for 2 h, cooled to room temperature and filtered. Slow evaporation of the filtrate in an open vial resulted in block-shaped, yellow crystals after two weeks, which were then collected by filtration and air dried. Yield: 0.083 g (15% based on  $\text{SeAs}_3\text{Mo}_{10}$ ). Elemental analysis (%): Calcd: C 7.83, N 1.52, Se 2.86, As 8.14, Ce, 5.07, Mo 34.74; Found: C 8.02, N 1.78, Se 2.69, As 8.24, Ce, 4.47, Mo 35.32. IR (2% KBr pellet,  $\nu/\text{cm}^{-1}$ ): 3438 (w), 3134 (w), 2808 (w), 1629 (m), 1544 (m), 1414 (m), 946 (s), 876 (s), 702 (s), 668 (s).

**In situ Approach:**  $(\text{NH}_4)_6\text{Mo}_7\text{O}_{24}\cdot 4\text{H}_2\text{O}$  (2.001 g, 1.619 mmol),  $\text{SeO}_2$  (0.201 g, 1.811 mmol), *p*-aminophenylarsonic acid (0.199 g, 0.917 mmol), and  $\text{Ce}(\text{NO}_3)_3\cdot 6\text{H}_2\text{O}$  (0.300 g, 0.691 mmol) were dissolved in 15 mL of distilled water for 20 min upon stirring. Then, the pH of the above solution was adjusted to 1.2 using HCl (6 M). The mixture was stirred and heated at 90 °C for 2 h, cooled to room temperature and filtered. Slow evaporation of the filtrate in an open vial resulted in block-shaped, yellow crystals after two weeks, which were then collected by filtration and air dried. Yield: 0.405 g (24% based on *p*-aminophenylarsonic acid).

### 3. Characterizations on Compounds

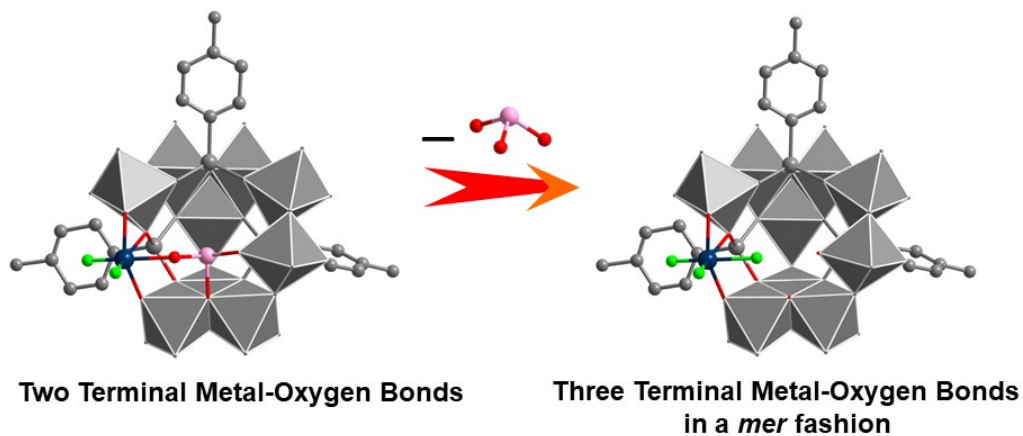

**Fig. S1.** Structural representation of the expected three terminal metal–oxygen bonds in a *mer* fashion. The terminal oxygen atoms are marked in green color.

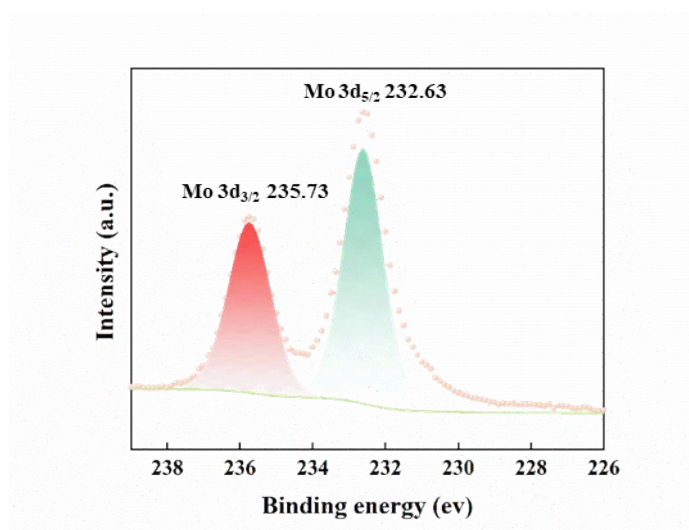

**Fig. S2.** XPS analysis for Mo<sup>VI</sup> in SeAs<sub>3</sub>Mo<sub>10</sub>.

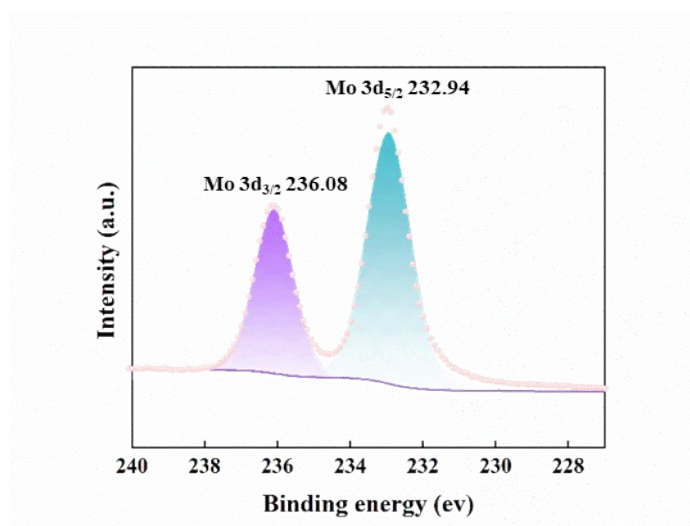

**Fig. S3.** XPS analysis for Mo<sup>VI</sup> in **Se<sub>2</sub>As<sub>2</sub>Mo<sub>10</sub>**.

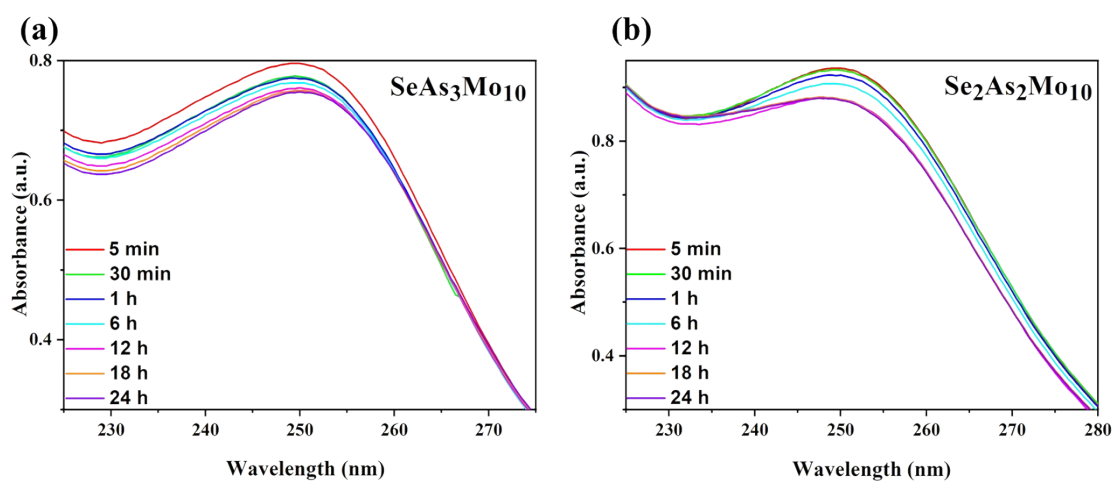

**Fig. S4.** UV-vis spectra of the aqueous solution containing **SeAs<sub>3</sub>Mo<sub>10</sub>** (a) and **Se<sub>2</sub>As<sub>2</sub>Mo<sub>10</sub>** (b) at different time intervals.

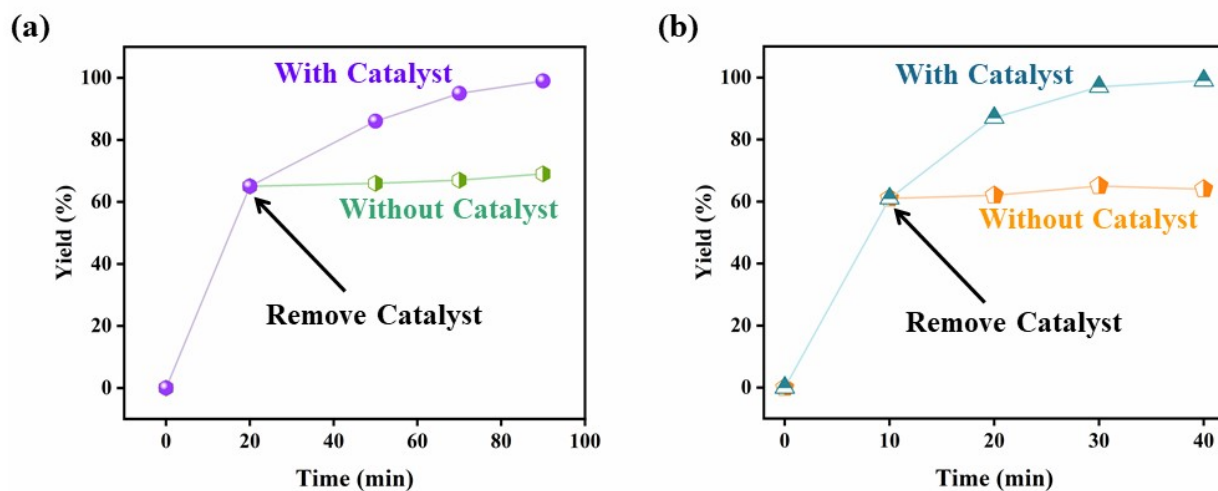

**Fig. S5.** (a) The filtration test of  $\text{SeAs}_3\text{Mo}_{10}$  as heterogeneous catalyst. (b) The filtration test of  $\text{Se}_2\text{As}_6\text{Mo}_{20}\text{Ce}_2$  as heterogeneous catalyst.

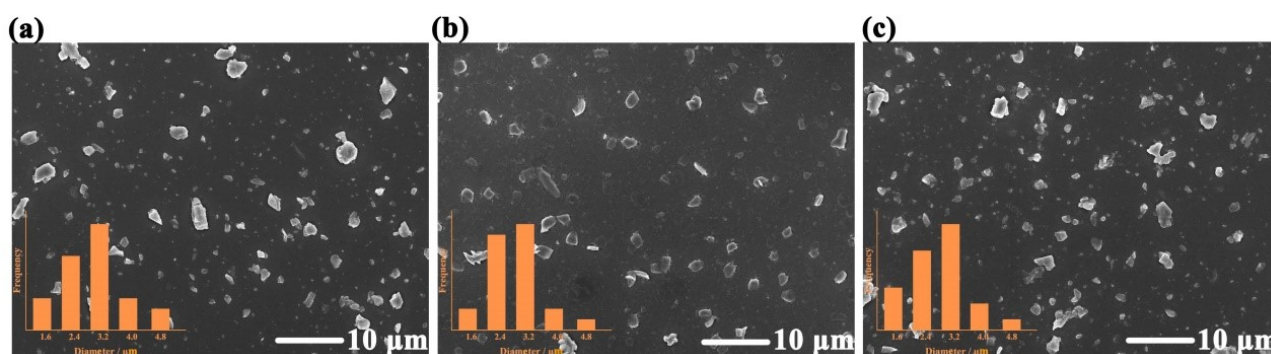

**Fig. S6.** SEM images and average size distribution of  $\text{SeAs}_3\text{Mo}_{10}$  (a),  $\text{Se}_2\text{As}_2\text{Mo}_{10}$  (b), and  $\text{Se}_2\text{As}_6\text{Mo}_{20}\text{Ce}_2$  (c).



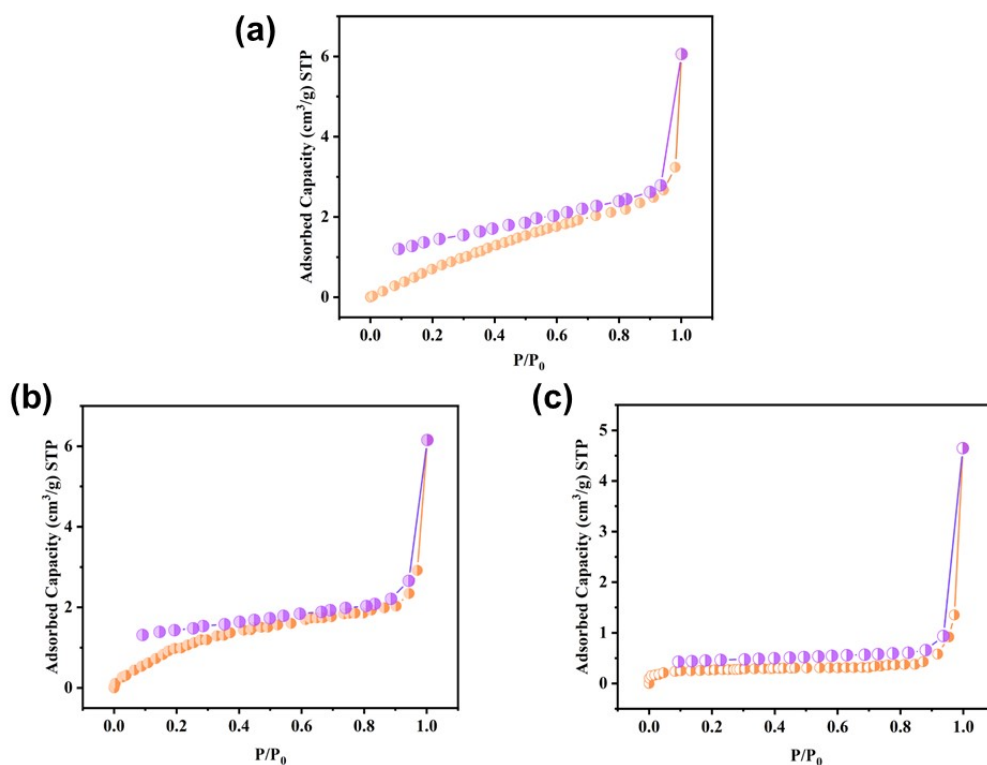

**Fig. S7.**  $N_2$  adsorption (orange) and desorption (purple) curves of  $SeAs_3Mo_{10}$  (a),  $Se_2As_2Mo_{10}$  (b), and  $Se_2As_6Mo_{20}Ce_2$  (c) at 77 K.

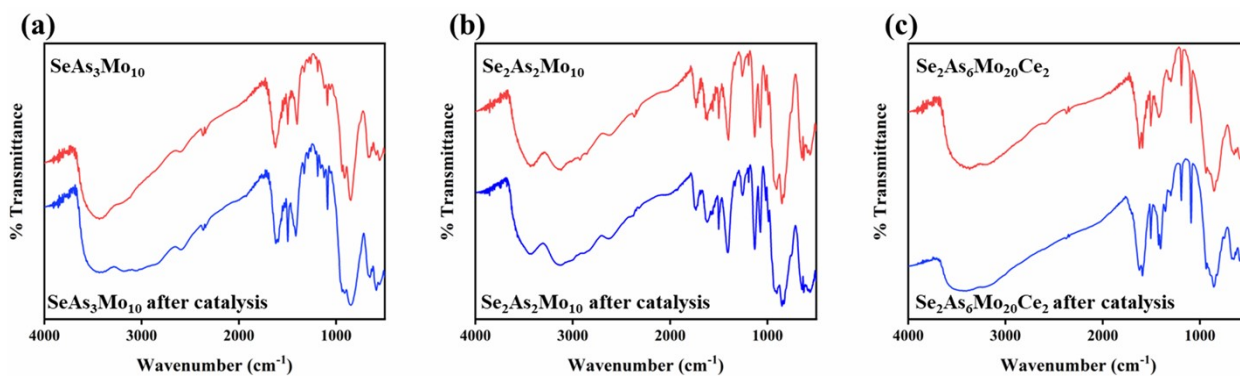

**Fig. S8.** FT-IR spectra of  $SeAs_3Mo_{10}$  (a),  $Se_2As_2Mo_{10}$  (b) and  $Se_2As_6Mo_{20}Ce_2$  (c) before and after catalysis.

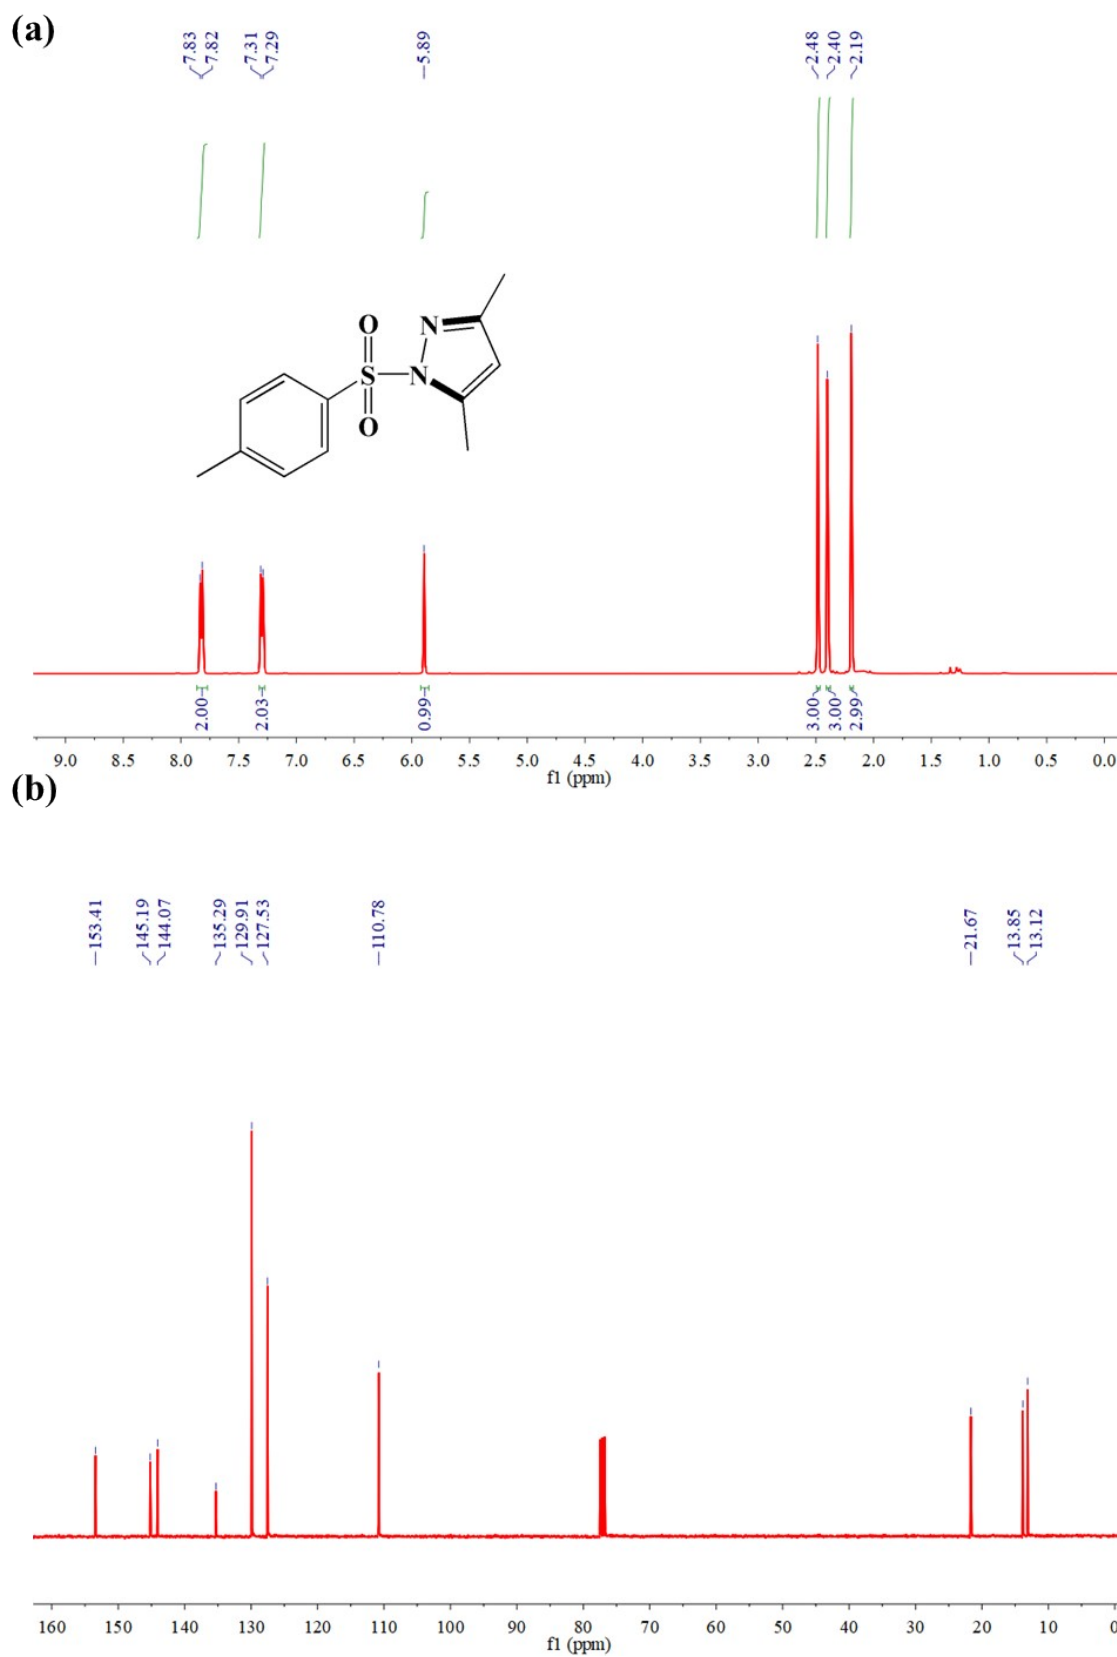

**Fig. S9.**  $^1\text{H}$  NMR (a) and  $^{13}\text{C}$  NMR (b) spectra of 3,5-dimethyl-1-tosyl-1H-pyrazole (**3a**).

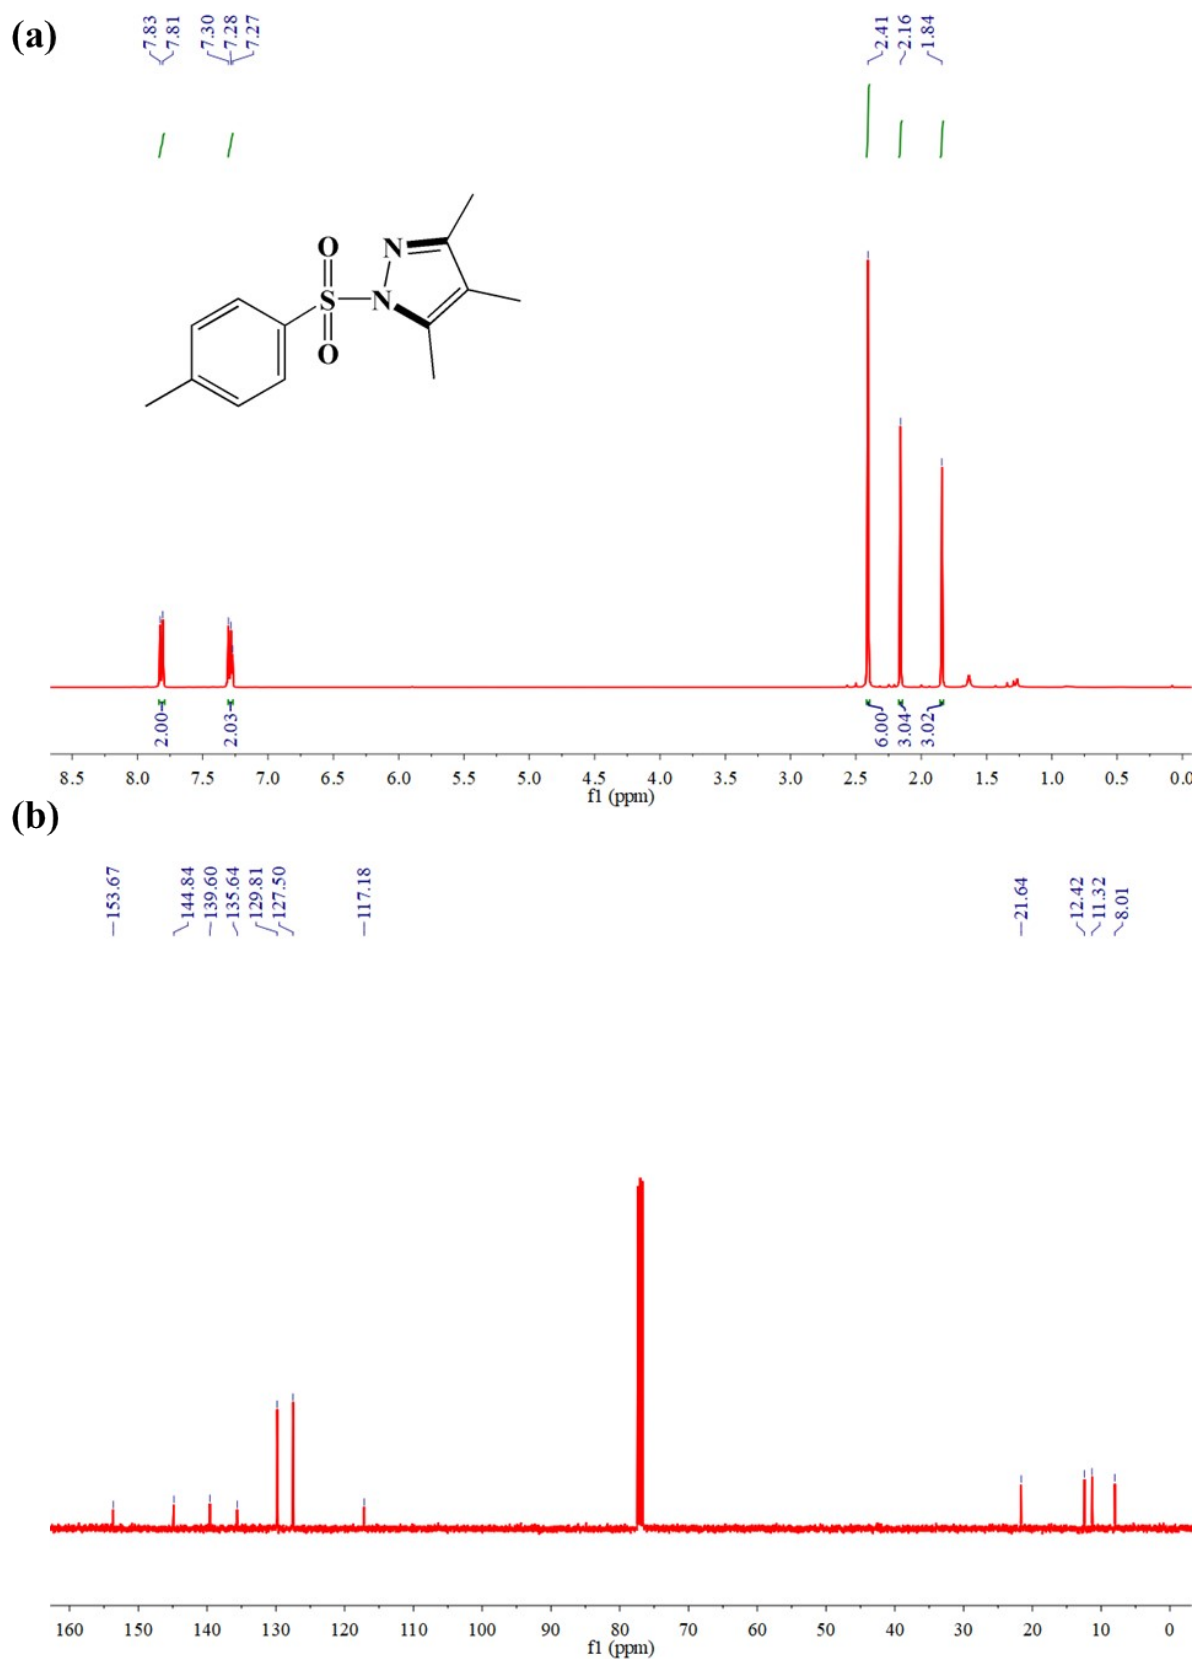

Fig. S10. <sup>1</sup>H NMR (a) and <sup>13</sup>C NMR (b) spectra of 3,4,5-trimethyl-1-tosyl-1H-pyrazole (**3b**).

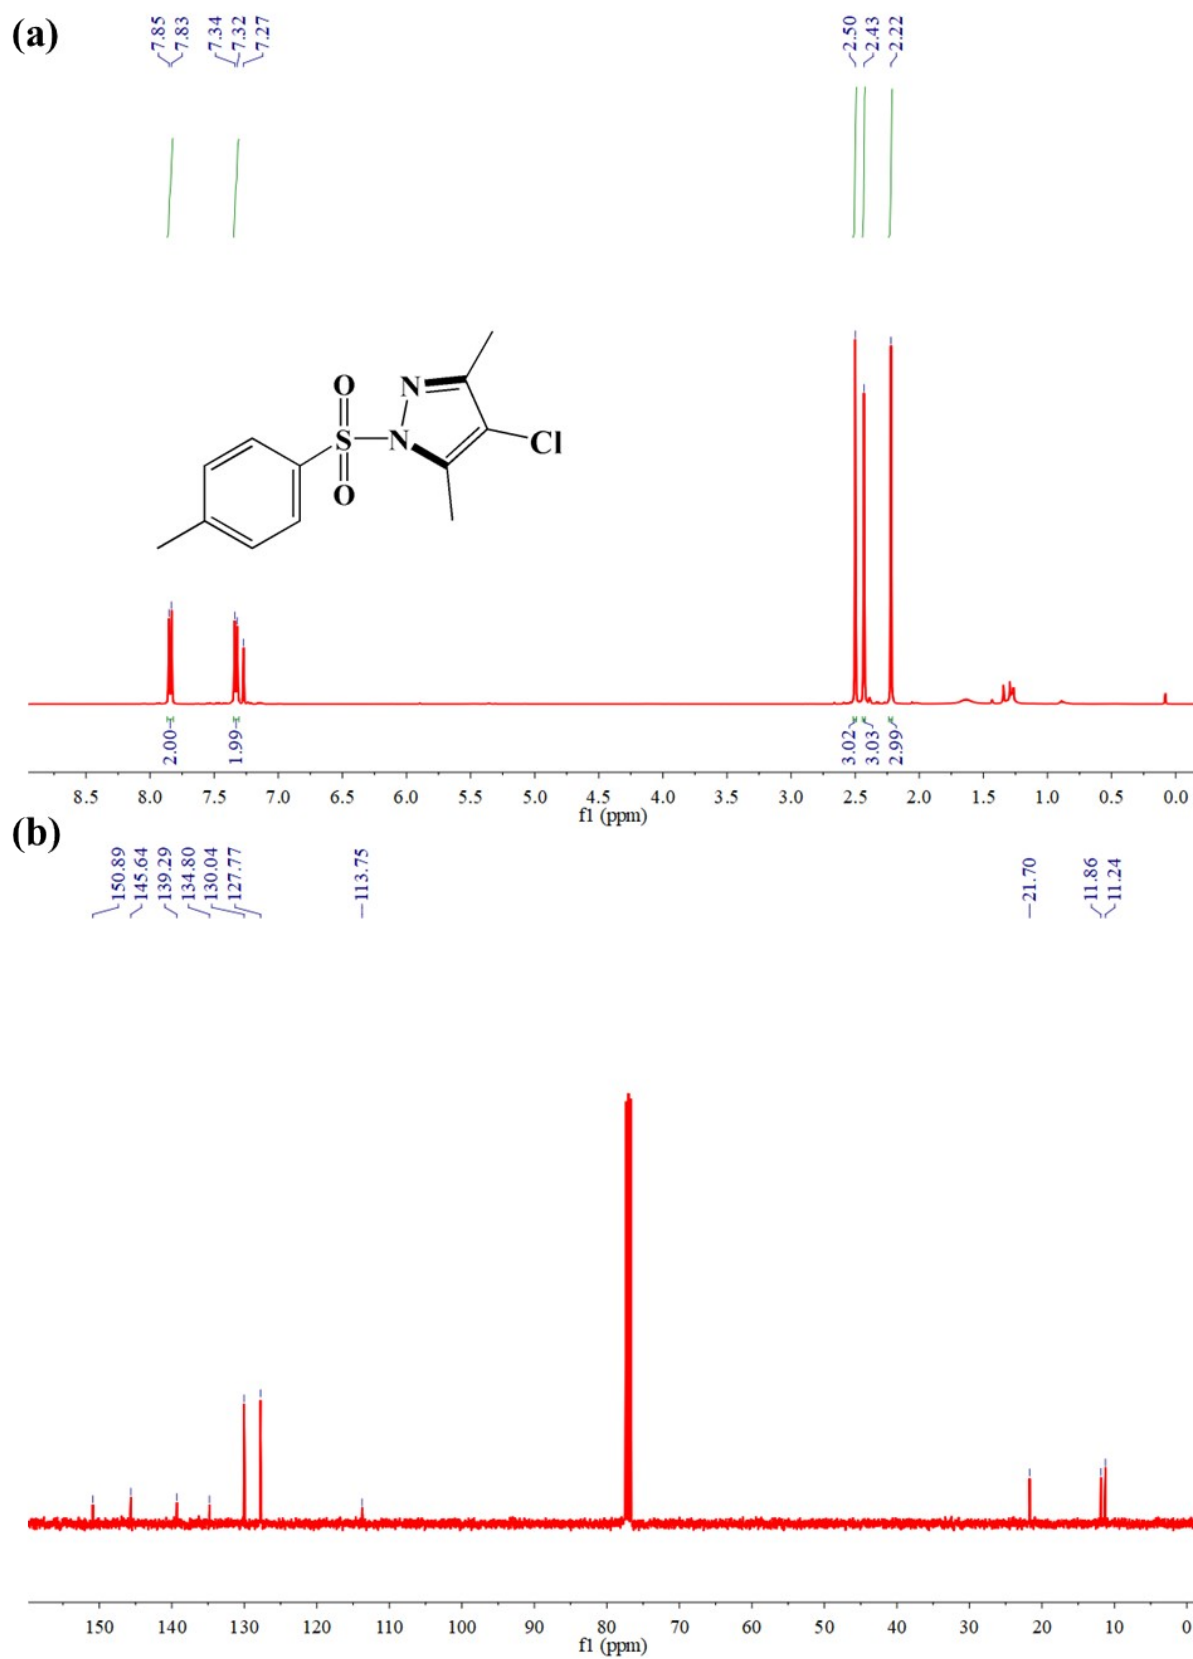

Fig. S11. <sup>1</sup>H NMR (a) and <sup>13</sup>C NMR (b) spectra of 4-chloro-3,5-dimethyl-1-tosyl-1H-pyrazole (3c).

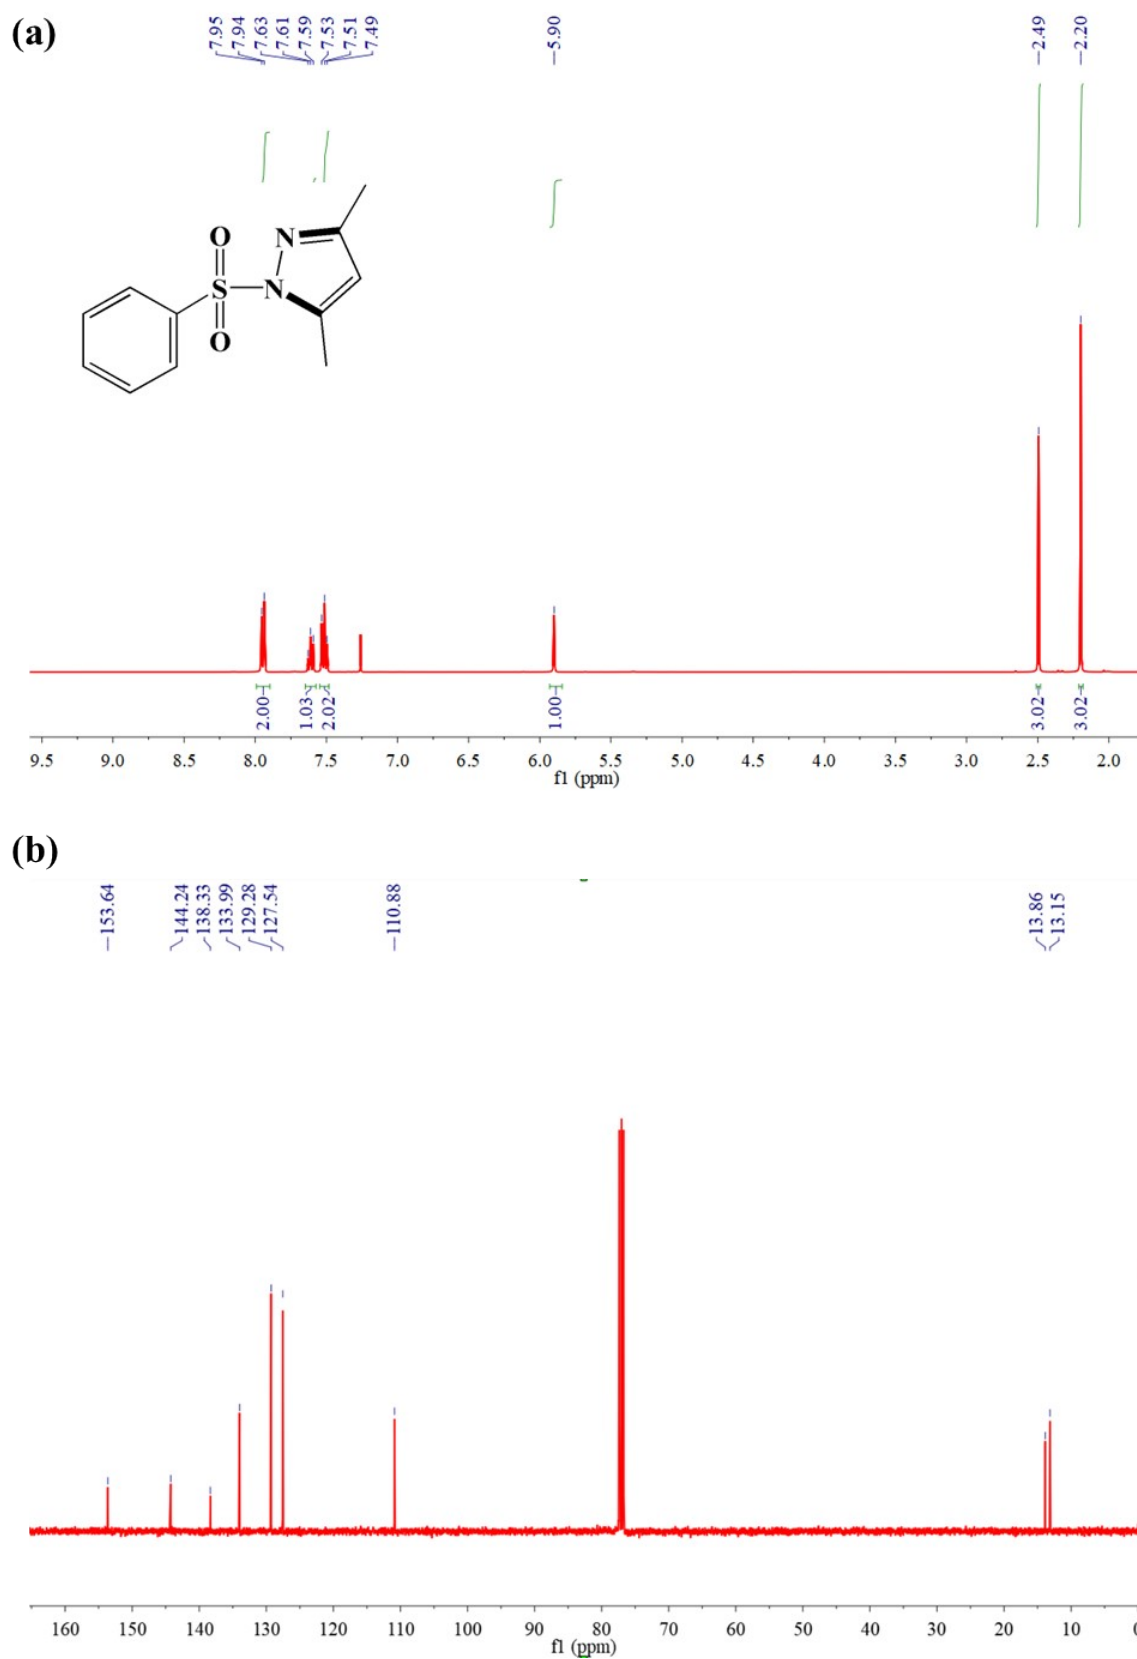

**Fig. S12.**  $^1\text{H}$  NMR (a) and  $^{13}\text{C}$  NMR (b) spectra of 3,5-dimethyl-1-(phenylsulfonyl)-1H-pyrazole (3d).

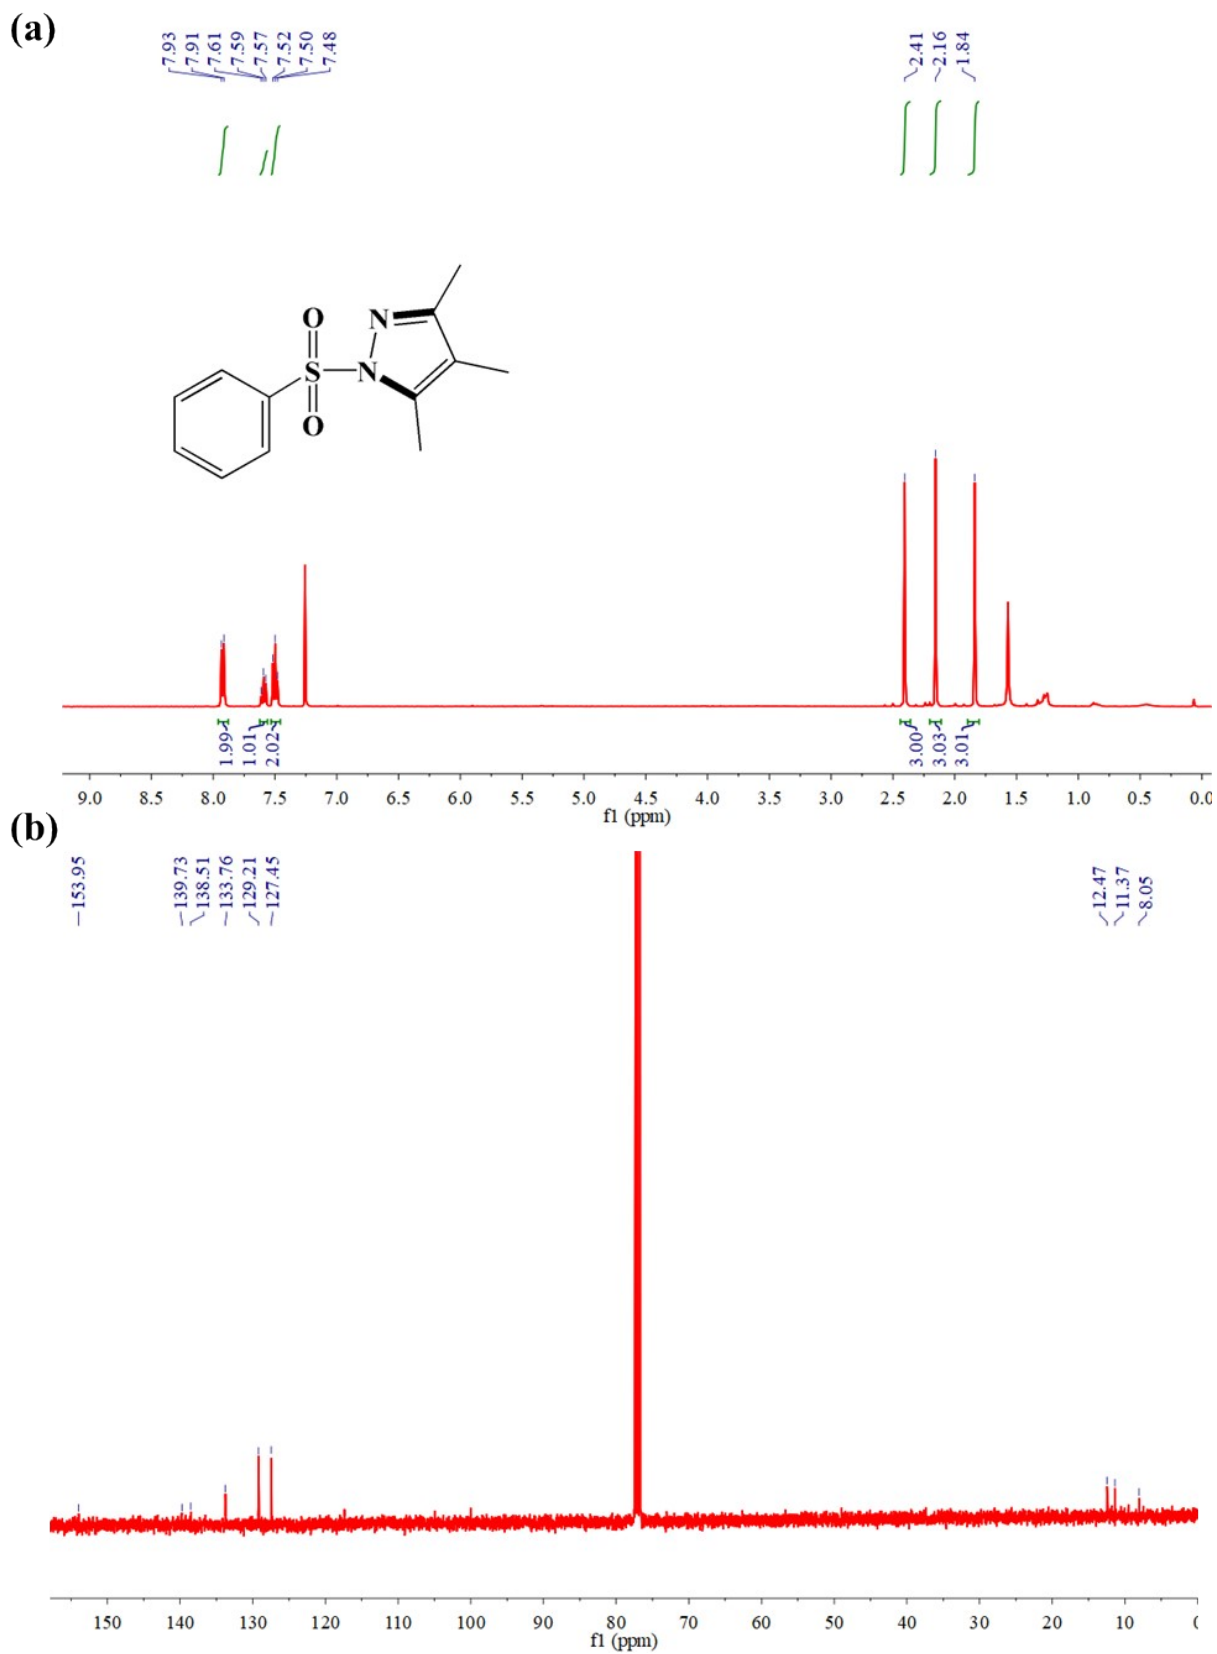

**Fig. S13.** <sup>1</sup>H NMR (a) and <sup>13</sup>C NMR (b) spectra of 3,4,5-trimethyl-1-(phenylsulfonyl)-1H-pyrazole (3e).

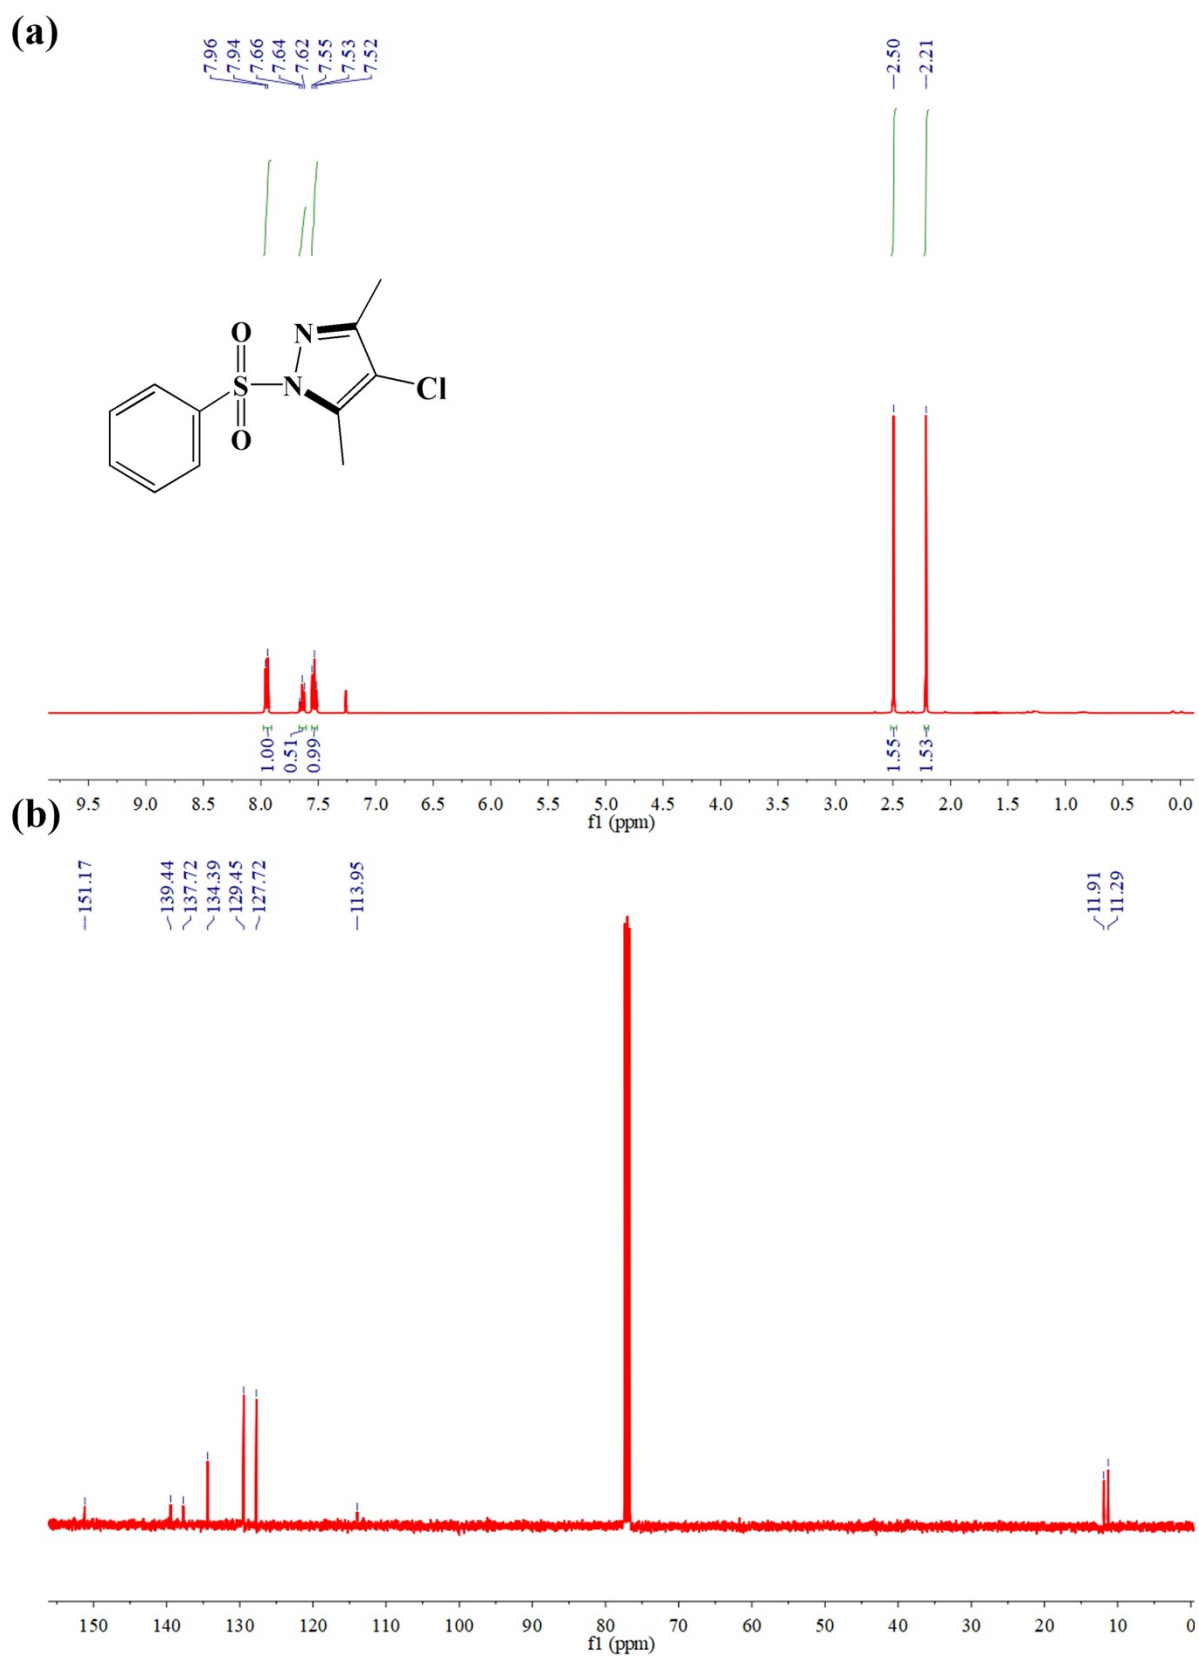

**Fig. S14.** <sup>1</sup>H NMR (a) and <sup>13</sup>C NMR (b) spectra of 4-chloro-3,5-dimethyl-1-(phenylsulfonyl)-1H-pyrazole (**3f**).

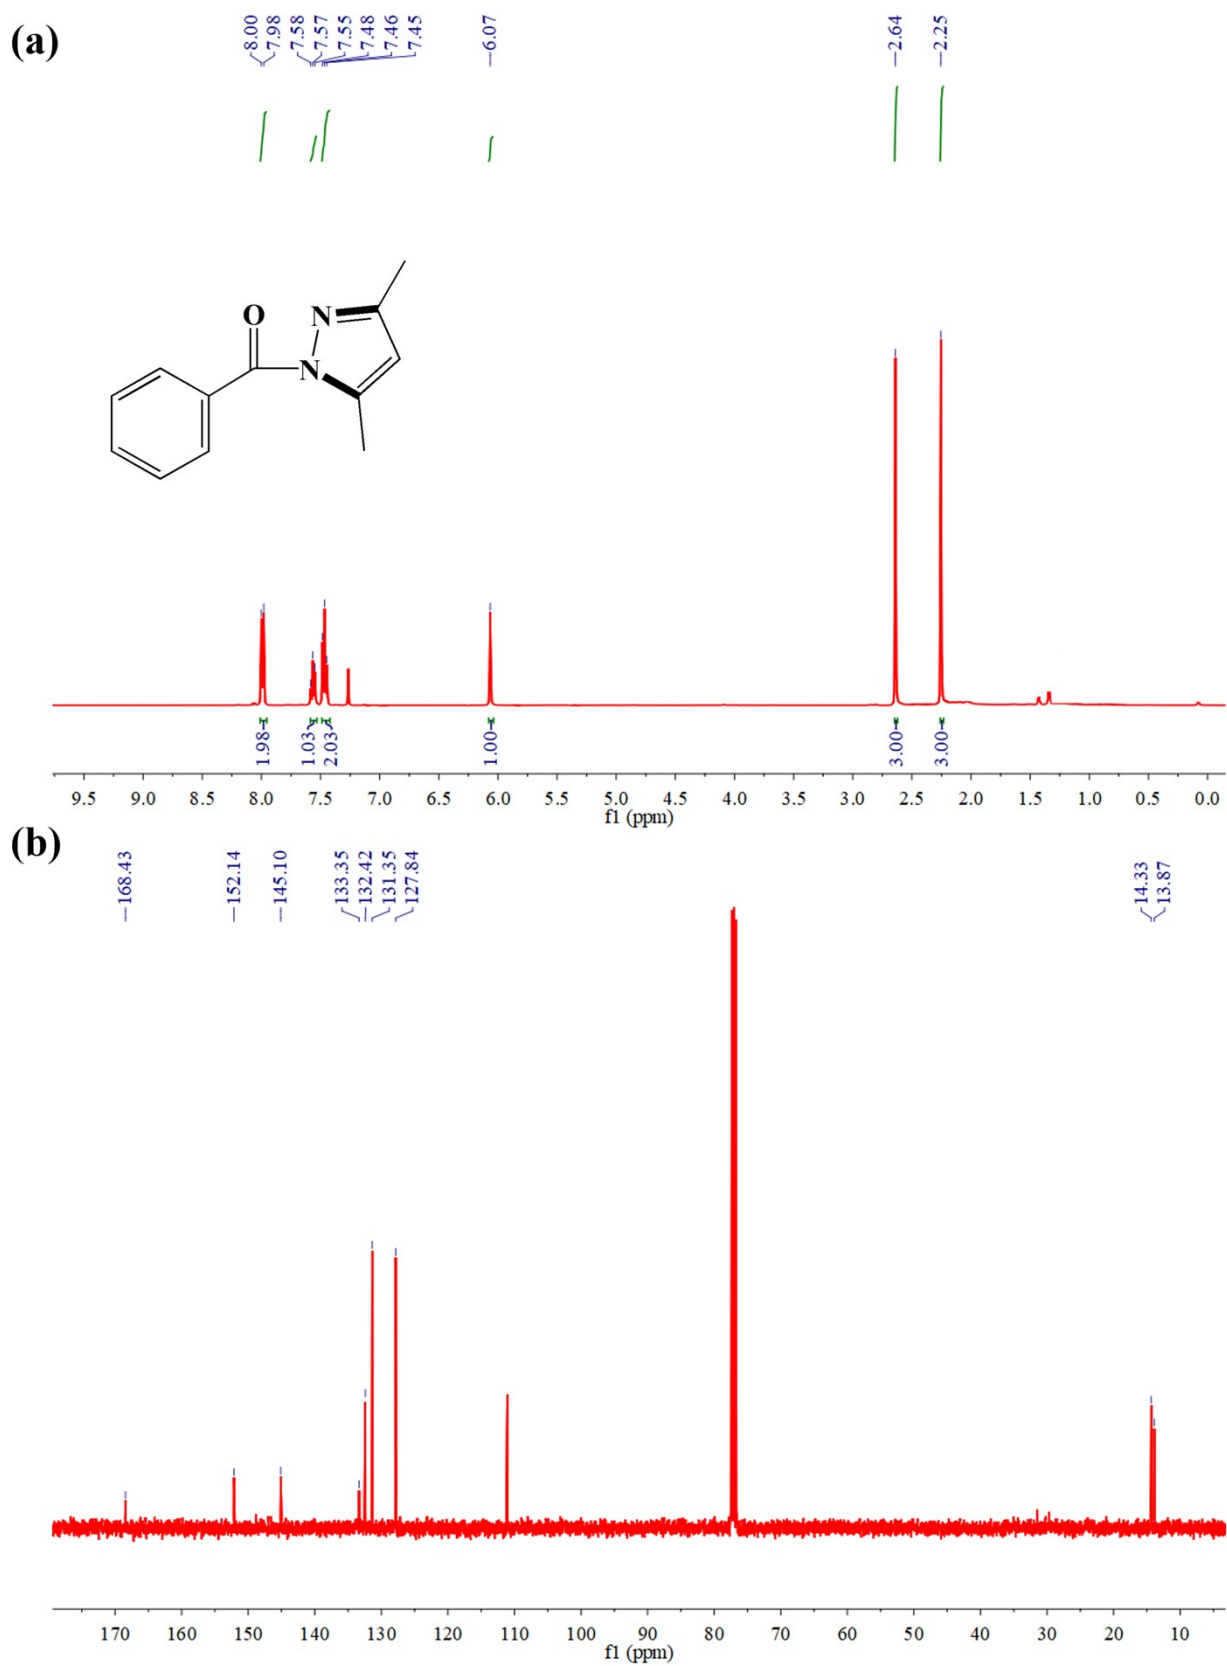

**Fig. S15.** <sup>1</sup>H NMR (a) and <sup>13</sup>C NMR (b) spectra of (3,5-dimethyl-1H-pyrazol-1-yl)(phenyl)methanone (**3g**).



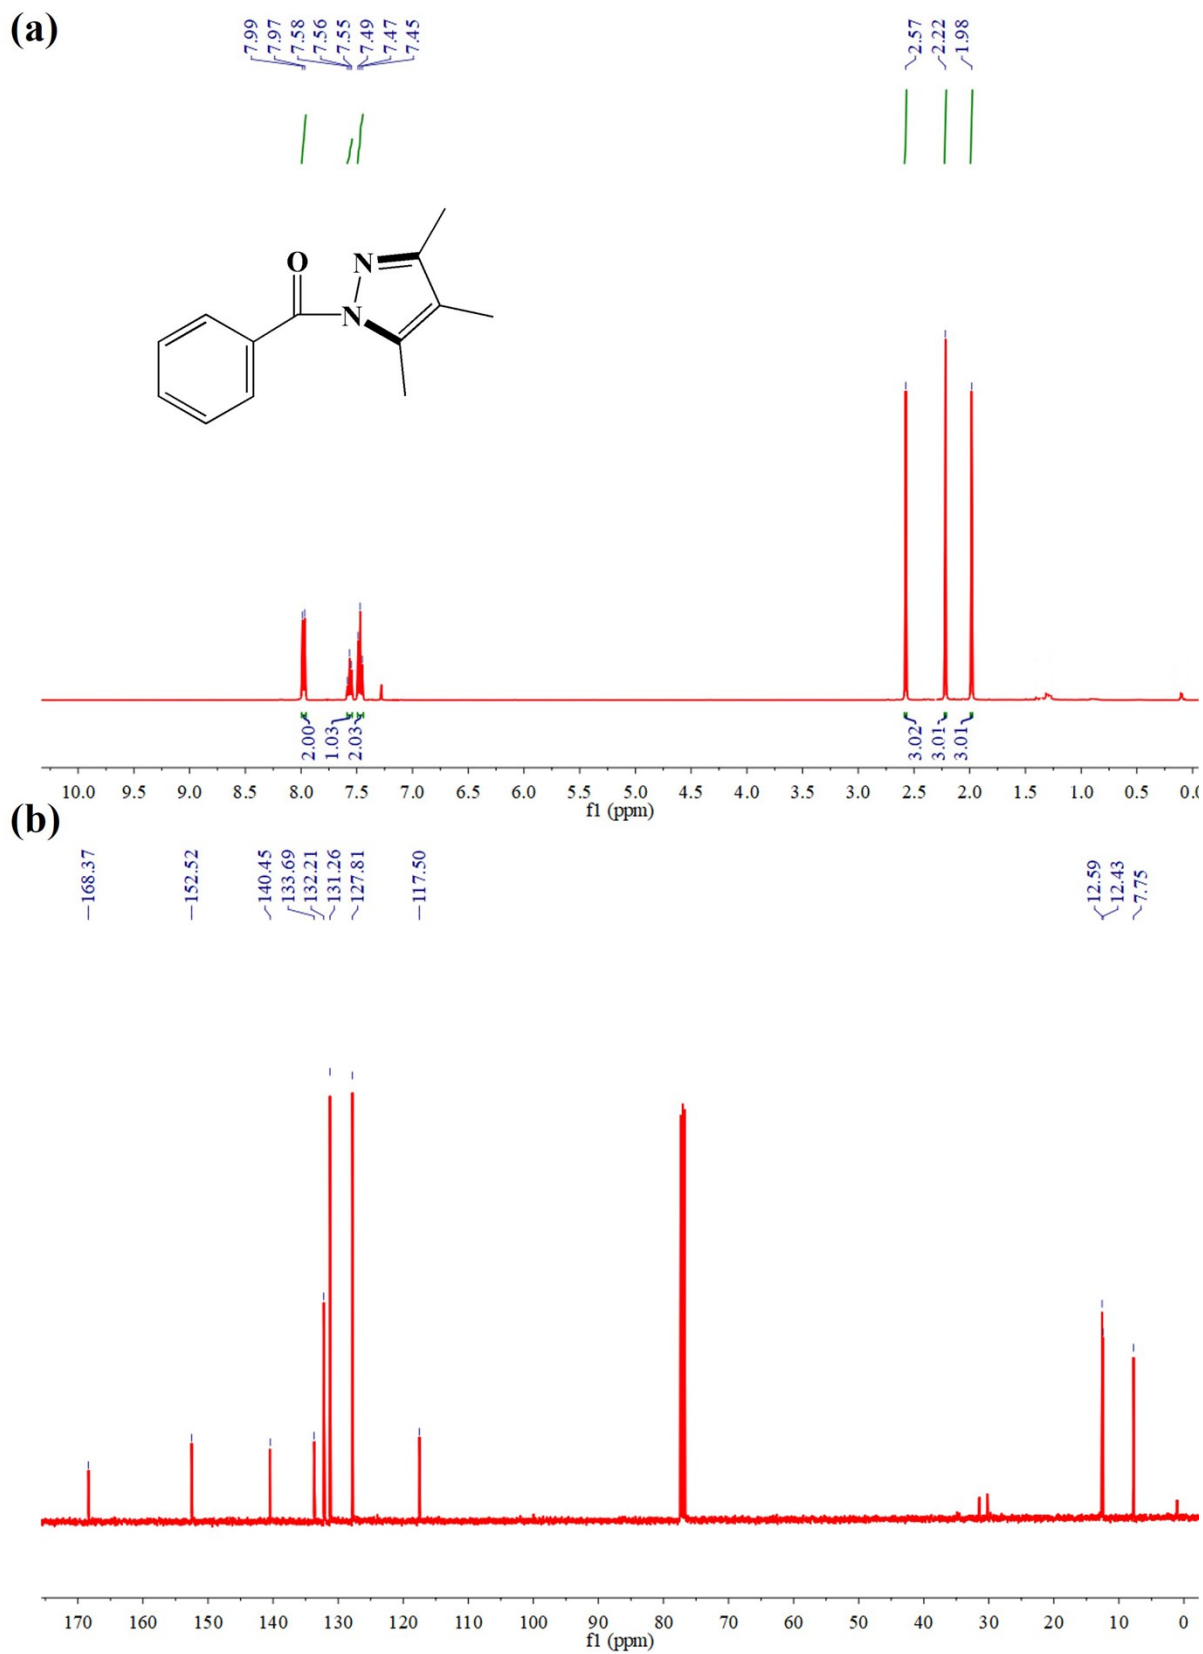

**Fig. S16.**  $^1\text{H}$  NMR (a) and  $^{13}\text{C}$  NMR (b) spectra of phenyl(3,4,5-trimethyl-1H-pyrazol-1-yl)methanone (**3h**).

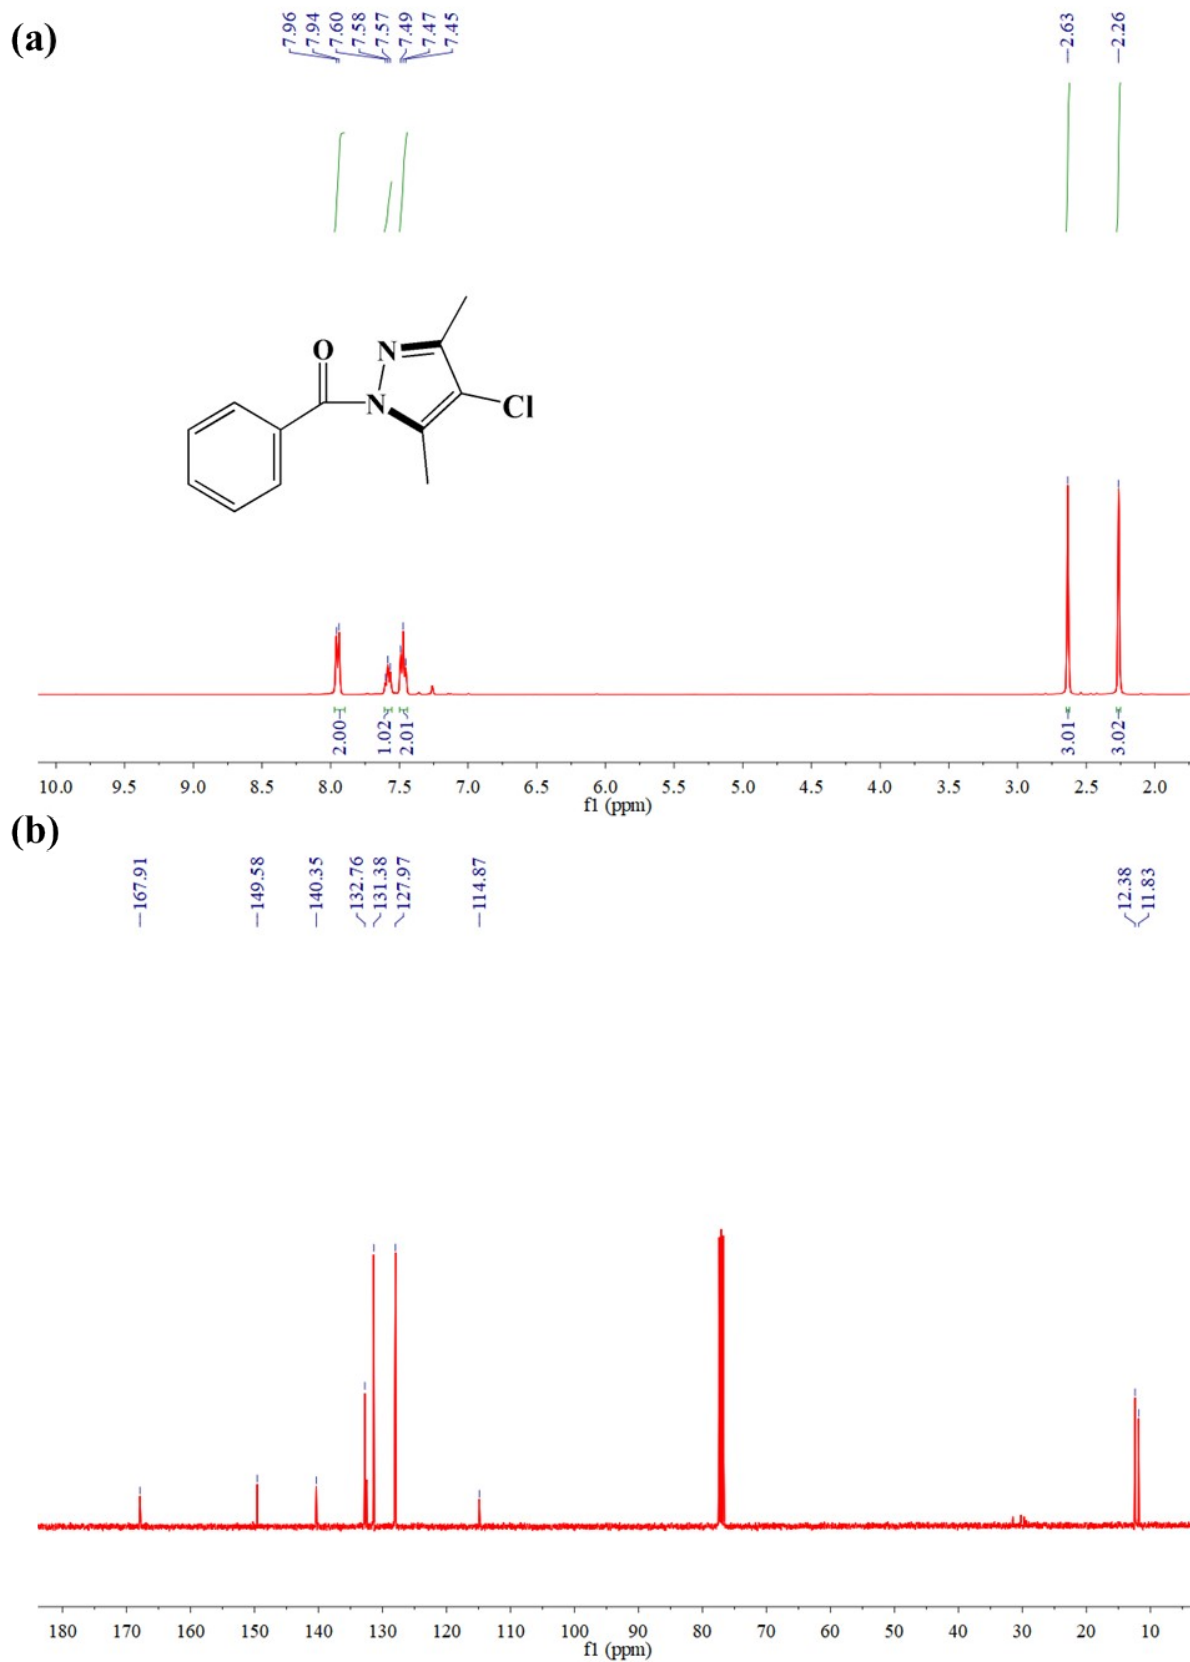

**Fig. S17.** <sup>1</sup>H NMR (a) and <sup>13</sup>C NMR (b) spectra of (4-chloro-3,5-dimethyl-1H-pyrazol-1-yl)(phenyl)methanone (**3i**).

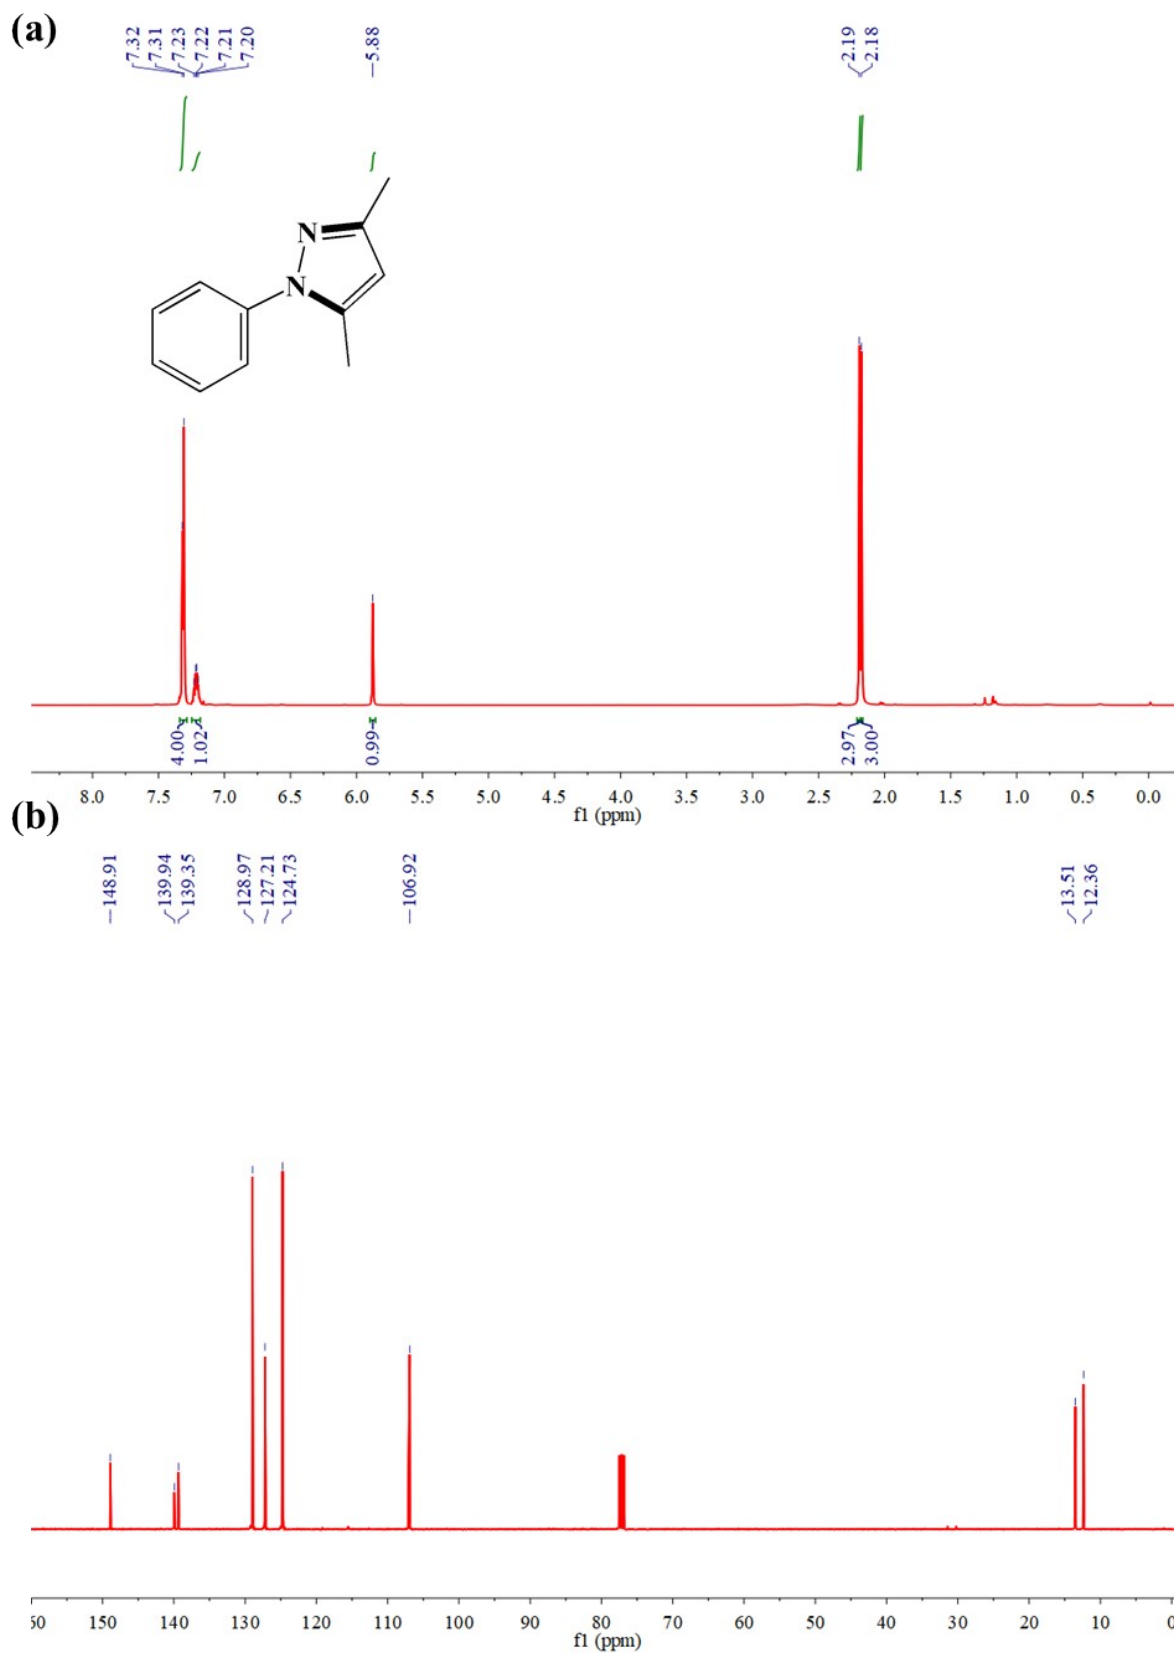

**S18.**  $^1\text{H}$  NMR (a) and  $^{13}\text{C}$  NMR (b) spectra of 3,5-dimethyl-1-phenyl-1H-pyrazole (**3j**).

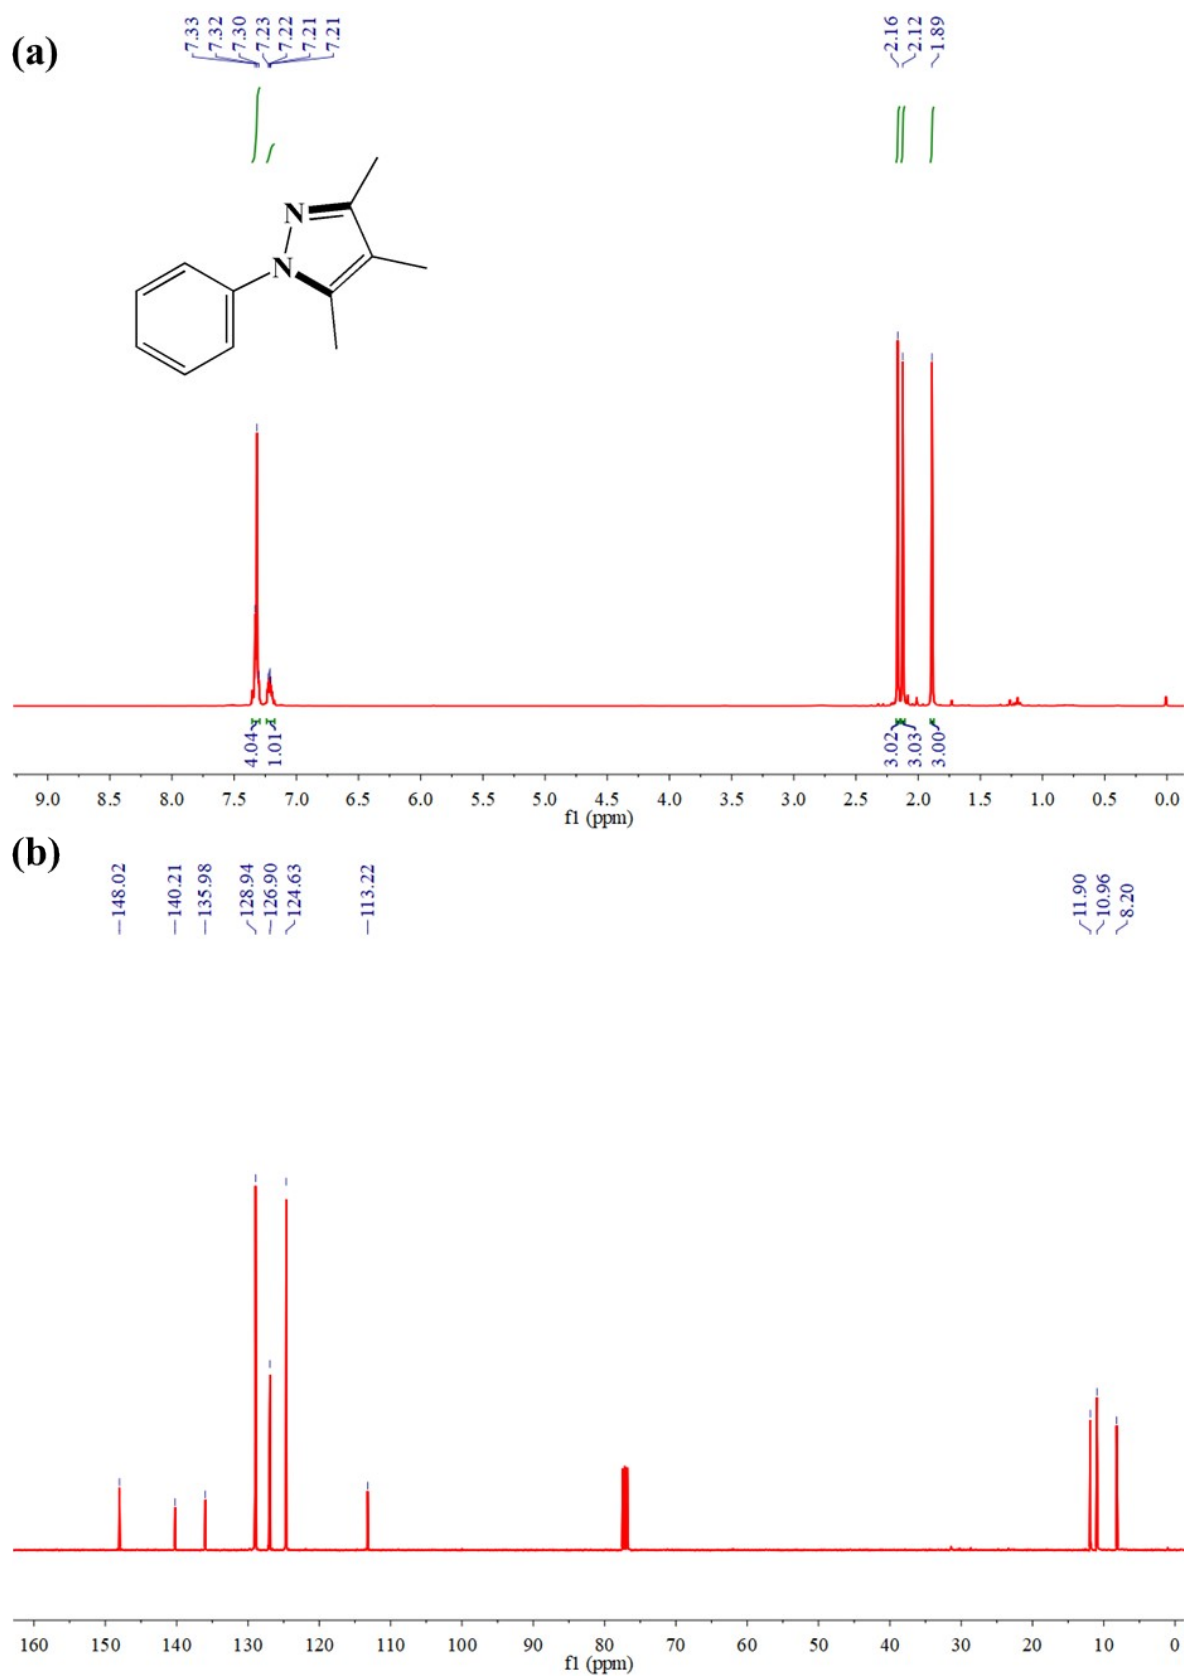

Fig. S19. <sup>1</sup>H NMR (a) and <sup>13</sup>C NMR (b) spectra of 3,4,5-trimethyl-1-phenyl-1H-pyrazole (3k).

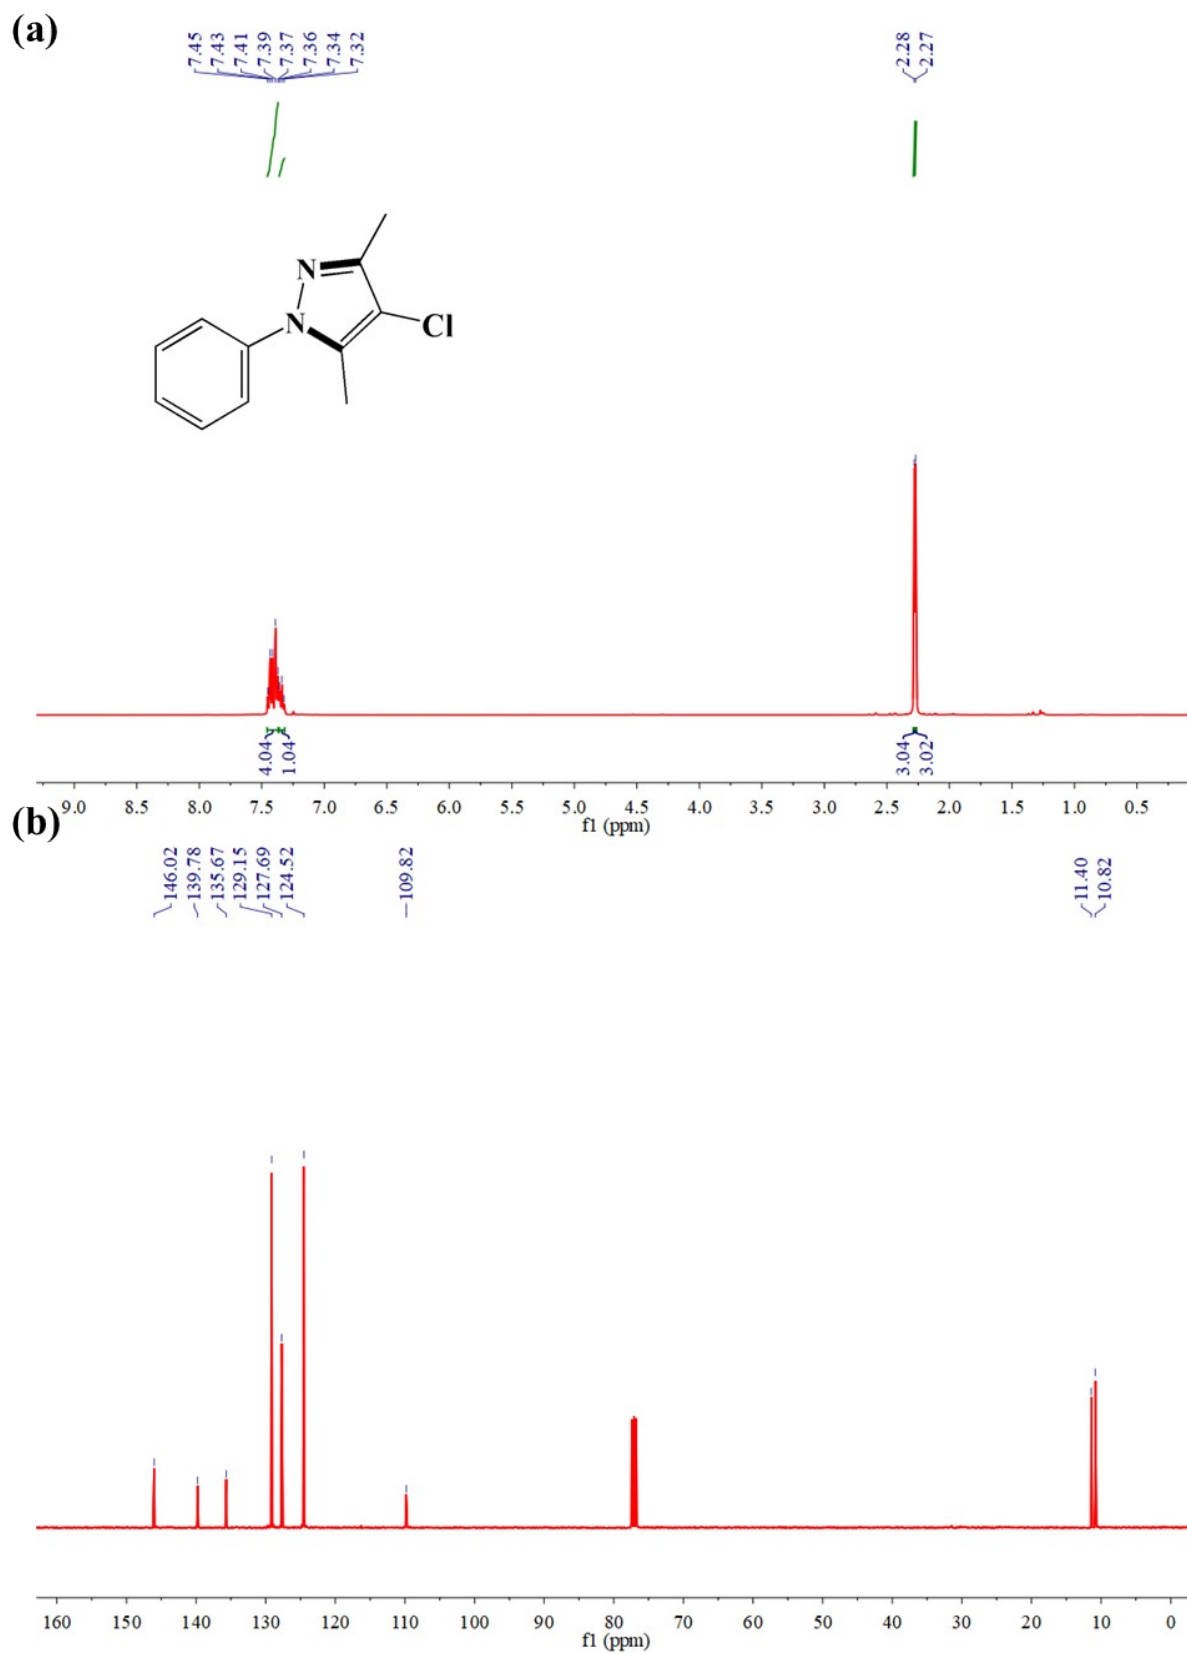

**Fig. S20.** <sup>1</sup>H NMR (a) and <sup>13</sup>C NMR (b) spectra of 4-chloro-3,5-dimethyl-1-phenyl-1H-pyrazole (3I).

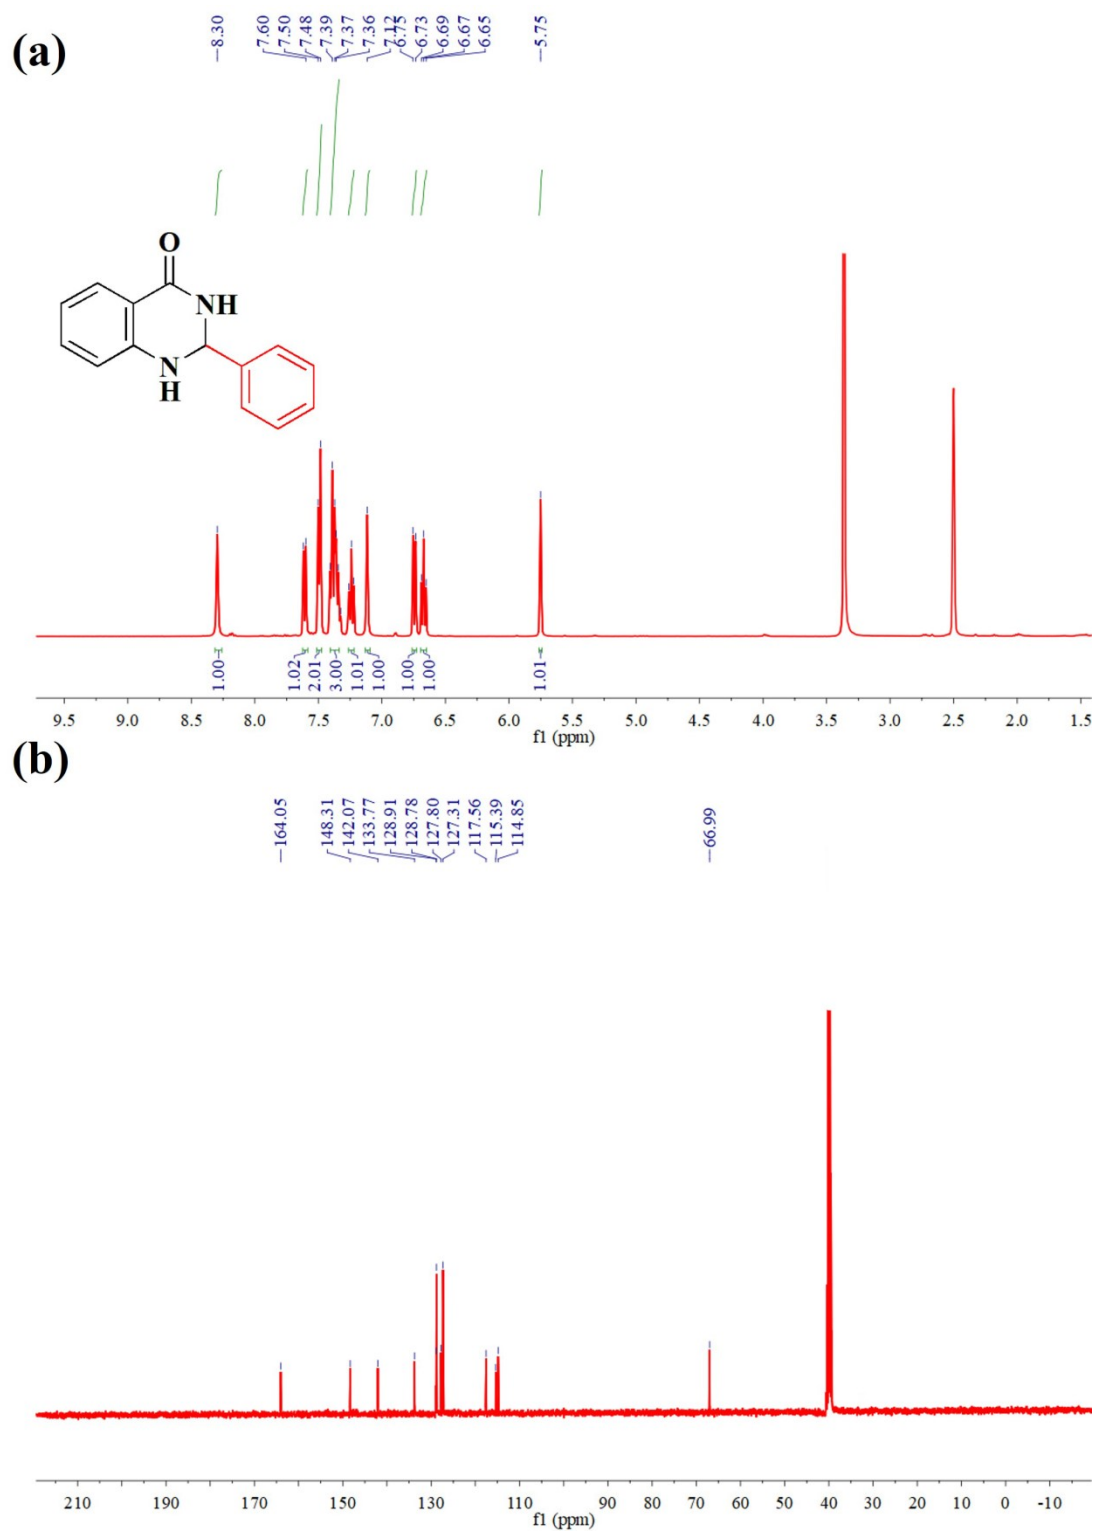

Fig. S21.  $^1\text{H}$  NMR (a) and  $^{13}\text{C}$  NMR (b) spectra of 2-Phenyl-2,3-dihydroquinazolin-4(1H)-one.

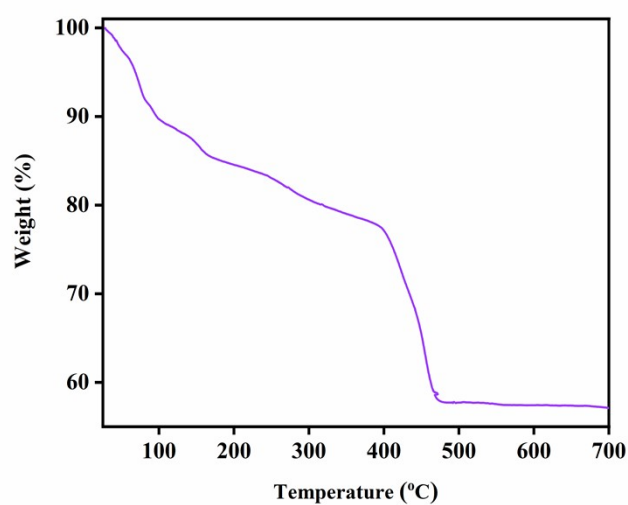

Fig. S22. Thermogravimetric curve of  $\text{Se}_2\text{As}_6\text{Mo}_{20}\text{Ce}_2$ .

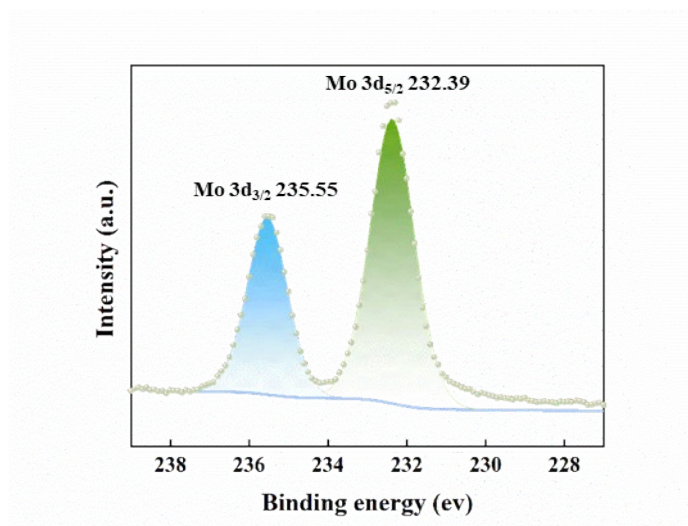

Fig. S23. XPS analysis for Mo<sup>VI</sup> in  $\text{Se}_2\text{As}_6\text{Mo}_{20}\text{Ce}_2$ .

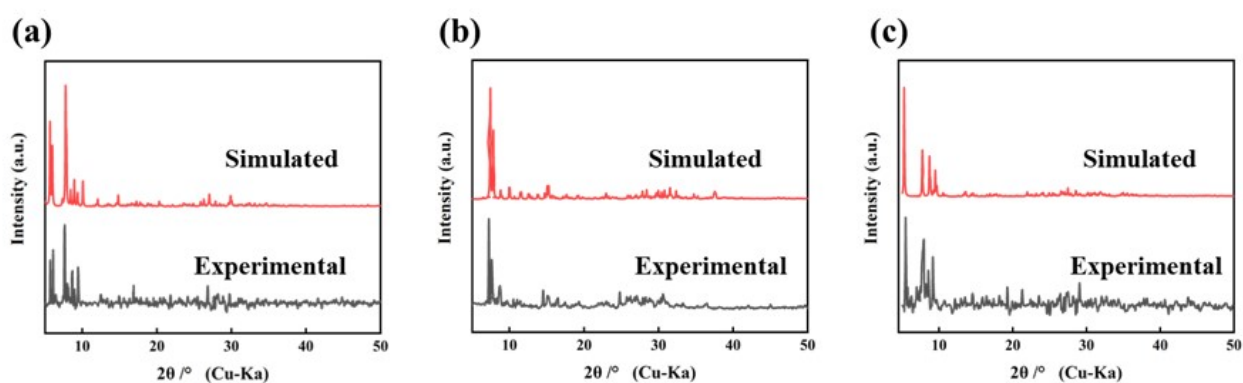

Fig. S24. Powder XRD patterns of  $\text{SeAs}_3\text{Mo}_{10}$  (a),  $\text{Se}_2\text{As}_2\text{Mo}_{10}$  (b) and  $\text{Se}_2\text{As}_6\text{Mo}_{20}\text{Ce}_2$  (c).

**Table S1** BVS values for different structural types of addenda and oxygen atoms in **SeAs<sub>3</sub>Mo<sub>10</sub>** and **Se<sub>2</sub>As<sub>2</sub>Mo<sub>10</sub>**

| <b>SeAs<sub>3</sub>Mo<sub>10</sub></b>             |                  |          |                  |          |                  |
|----------------------------------------------------|------------------|----------|------------------|----------|------------------|
| <b>Mo</b>                                          | <b>BVS value</b> | <b>O</b> | <b>BVS value</b> | <b>O</b> | <b>BVS value</b> |
| Mo1                                                | 5.761            | O7       | 1.967            | O24      | 2.198            |
| Mo2                                                | 5.966            | O8       | 1.480            | O25      | 1.803            |
| Mo3                                                | 5.760            | O9       | 2.570            | O26      | 1.969            |
| Mo4                                                | 5.582            | O10      | 2.007            | O27      | 2.362            |
| Mo5                                                | 6.104            | O11      | 2.008            | O28      | 1.452            |
| Mo6                                                | 5.814            | O12      | 2.165            | O29      | 1.618            |
| Mo7                                                | 5.721            | O13      | 1.852            | O30      | 1.533            |
| Mo8                                                | 5.724            | O14      | 1.983            | O31      | 2.176            |
| Mo9                                                | 5.722            | O15      | 1.618            | O32      | 1.452            |
| Mo10                                               | 6.316            | O16      | 1.754            | O33      | 2.317            |
| <b>O</b>                                           | <b>BVS value</b> | O17      | 1.575            | O34      | 1.533            |
| O1                                                 | 2.243            | O18      | 1.492            | O35      | 1.533            |
| O2                                                 | 1.865            | O19      | 1.575            | O36      | 1.708            |
| O3                                                 | 2.044            | O20      | 2.015            | O37      | 2.170            |
| O4                                                 | 1.741            | O21      | 2.029            | O38      | 1.533            |
| O5                                                 | 2.438            | O22      | 1.694            | O39      | 2.008            |
| O6                                                 | 1.708            | O23      | 2.069            | O40      | 2.102            |
|                                                    |                  |          |                  | O41      | 2.025            |
| <b>Se<sub>2</sub>As<sub>2</sub>Mo<sub>10</sub></b> |                  |          |                  |          |                  |
| <b>Mo</b>                                          | <b>BVS value</b> | <b>O</b> | <b>BVS value</b> | <b>O</b> | <b>BVS value</b> |
| Mo12                                               | 6.082            | O89      | 1.662            | O106     | 1.618            |
| Mo16                                               | 5.867            | O90      | 1.966            | O107     | 1.803            |
| Mo24                                               | 5.862            | O91      | 1.708            | O108     | 1.708            |
| Mo25                                               | 6.001            | O92      | 1.855            | O109     | 1.533            |
| Mo26                                               | 6.230            | O93      | 1.618            | O110     | 1.918            |
| Mo27                                               | 5.961            | O94      | 1.618            | O111     | 1.950            |
| Mo28                                               | 6.326            | O95      | 2.158            | O112     | 1.662            |
| Mo29                                               | 6.013            | O96      | 1.957            | O113     | 1.841            |
| Mo30                                               | 6.008            | O97      | 1.921            | O114     | 1.769            |
| Mo31                                               | 6.103            | O98      | 1.452            | O115     | 1.662            |
| <b>O</b>                                           | <b>BVS value</b> | O99      | 1.829            | O116     | 2.066            |
| O42                                                | 2.022            | O100     | 1.533            | O117     | 1.984            |
| O84                                                | 1.983            | O101     | 1.900            | O118     | 1.810            |
| O85                                                | 1.662            | O102     | 1.662            | O119     | 1.618            |
| O86                                                | 1.846            | O103     | 1.533            | O120     | 2.104            |
| O87                                                | 1.575            | O104     | 1.769            | O121     | 1.772            |
| O88                                                | 1.929            | O105     | 1.662            | O122     | 1.925            |
|                                                    |                  |          |                  | O123     | 1.575            |



**Table S2** Assignments and  $m/z$  values for the main peaks observed in the ESI-MS spectra of**SeAs<sub>3</sub>Mo<sub>10</sub> and Se<sub>2</sub>As<sub>2</sub>Mo<sub>10</sub>**

| <b>SeAs<sub>3</sub>Mo<sub>10</sub></b>             |                                                                                                                                     |
|----------------------------------------------------|-------------------------------------------------------------------------------------------------------------------------------------|
| <b><i>m/z</i></b>                                  | <b>Formula</b>                                                                                                                      |
| 539.21                                             | $\{(\text{NH}_4)_3\text{Mo}_4\text{O}_{13}(\text{NH}_3\text{C}_6\text{H}_4\text{AsO}_3)(\text{SeO}_3)(\text{H}_2\text{O})_5\}^{2-}$ |
| 609.15                                             | $\{(\text{NH}_4)_5\text{Mo}_6\text{O}_{21}(\text{NH}_3\text{C}_6\text{H}_4\text{AsO}_3)\}^{2-}$                                     |
| 1272.51                                            | $\{(\text{NH}_4)_6\text{Mo}_6\text{O}_{21}(\text{NH}_3\text{C}_6\text{H}_4\text{AsO}_3)(\text{H}_2\text{O})_2\}^-$                  |
| 1343.88                                            | $\{(\text{NH}_4)_6\text{Mo}_6\text{O}_{21}(\text{NH}_3\text{C}_6\text{H}_4\text{AsO}_3)(\text{H}_2\text{O})_6\}^-$                  |
| <b>Se<sub>2</sub>As<sub>2</sub>Mo<sub>10</sub></b> |                                                                                                                                     |
| <b><i>m/z</i></b>                                  | <b>Formula</b>                                                                                                                      |
| 475.19                                             | $\{(\text{NH}_4)_5\text{Mo}_3\text{O}_{11}(\text{NH}_3\text{C}_6\text{H}_4\text{AsO}_3)(\text{SeO}_3)(\text{H}_2\text{O})_3\}^{2-}$ |
| 539.73                                             | $\{(\text{NH}_4)_2\text{Mo}_4\text{O}_{13}(\text{SeO}_3)_2(\text{H}_2\text{O})_{11}\}^{2-}$                                         |
| 788.55                                             | $\{(\text{NH}_4)_4\text{Mo}_3\text{O}_{11}(\text{NH}_3\text{C}_6\text{H}_4\text{AsO}_3)(\text{H}_2\text{O})_2\}^-$                  |

**Table S3** Condition optimization for the model reaction<sup>a</sup>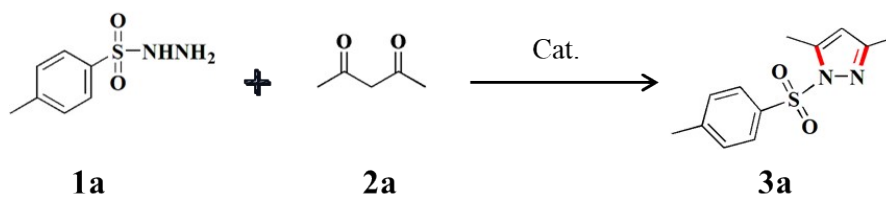

| Entry | Catalyst (1.5 mol%)                                              | Temp. (°C) | Time (min) | Solvent | Yield <sup>b</sup> (%) |
|-------|------------------------------------------------------------------|------------|------------|---------|------------------------|
| 1     | —                                                                | RT         | 10         | DMC     | 28                     |
| 2     | —                                                                | RT         | 60         | DMC     | 55                     |
| 3     | <b>SeAs<sub>3</sub>Mo<sub>10</sub></b>                           | RT         | 30         | DMC     | 74                     |
| 4     | <b>SeAs<sub>3</sub>Mo<sub>10</sub></b>                           | RT         | 60         | DMC     | 93                     |
| 5     | <b>SeAs<sub>3</sub>Mo<sub>10</sub></b>                           | RT         | 90         | DMC     | 99                     |
| 6     | <b>SeAs<sub>3</sub>Mo<sub>10</sub></b>                           | RT         | 90         | DCE     | 99                     |
| 7     | <b>SeAs<sub>3</sub>Mo<sub>10</sub></b>                           | RT         | 90         | Ph-Cl   | 99                     |
| 8     | <b>Se<sub>2</sub>As<sub>2</sub>Mo<sub>10</sub></b>               | RT         | 3          | DMC     | 81                     |
| 9     | <b>Se<sub>2</sub>As<sub>2</sub>Mo<sub>10</sub></b>               | RT         | 5          | DMC     | 98                     |
| 10    | <b>Se<sub>2</sub>As<sub>2</sub>Mo<sub>10</sub></b>               | RT         | 10         | DMC     | 99                     |
| 11    | <b>Se<sub>2</sub>As<sub>2</sub>Mo<sub>10</sub></b>               | RT         | 10         | DCE     | 99                     |
| 12    | <b>Se<sub>2</sub>As<sub>2</sub>Mo<sub>10</sub></b>               | RT         | 10         | Ph-Cl   | 99                     |
| 13    | <b>Se<sub>2</sub>As<sub>6</sub>Mo<sub>20</sub>Ce<sub>2</sub></b> | RT         | 10         | DMC     | 68                     |
| 14    | <b>Se<sub>2</sub>As<sub>6</sub>Mo<sub>20</sub>Ce<sub>2</sub></b> | RT         | 30         | DMC     | 97                     |
| 15    | <b>Se<sub>2</sub>As<sub>6</sub>Mo<sub>20</sub>Ce<sub>2</sub></b> | RT         | 40         | DMC     | 99                     |
| 16    | <b>Se<sub>2</sub>As<sub>6</sub>Mo<sub>20</sub>Ce<sub>2</sub></b> | RT         | 40         | DCE     | 99                     |
| 17    | <b>Se<sub>2</sub>As<sub>6</sub>Mo<sub>20</sub>Ce<sub>2</sub></b> | RT         | 40         | Ph-Cl   | 99                     |
| 18    | <b>As<sub>4</sub>Mo<sub>12</sub></b>                             | RT         | 30         | DMC     | 66                     |
| 19    | <b>As<sub>4</sub>Mo<sub>12</sub></b>                             | RT         | 60         | DMC     | 75                     |
| 20    | <b>As<sub>4</sub>Mo<sub>12</sub></b>                             | RT         | 120        | DMC     | 99                     |
| 21    | <b>As<sub>4</sub>Mo<sub>12</sub></b>                             | RT         | 120        | DCE     | 99                     |
| 22    | <b>As<sub>4</sub>Mo<sub>12</sub></b>                             | RT         | 120        | Ph-Cl   | 99                     |

<sup>a</sup> Reaction conditions: *p*-toluenesulfonyl hydrazide **1a** (0.2 mmol), acetylacetone **2a** (0.2 mmol), solvent (0.5 mL). <sup>b</sup> The yields were determined by GC with biphenyl as the internal standard.

**Table S4** Dehydration condensation of *p*-toluenesulfonyl hydrazide and acetylacetone by different catalysts<sup>a</sup>

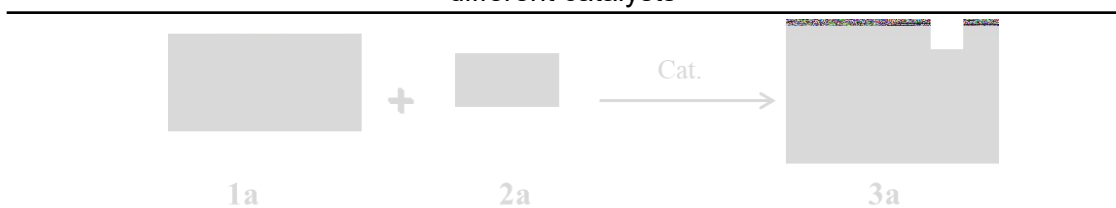

| Entry | Catalyst                                                                                | Temp. (°C) | Time (min) | Solvent | Yield <sup>b</sup> (%) |
|-------|-----------------------------------------------------------------------------------------|------------|------------|---------|------------------------|
| 1     | <b>SeAs<sub>3</sub>Mo<sub>10</sub></b>                                                  | RT         | 10         | DMC     | 61                     |
| 2     | <b>Se<sub>2</sub>As<sub>2</sub>Mo<sub>10</sub></b>                                      | RT         | 10         | DMC     | 99                     |
| 3     | <b>Se<sub>2</sub>As<sub>6</sub>Mo<sub>20</sub>Ce<sub>2</sub></b>                        | RT         | 10         | DMC     | 68                     |
| 4     | <b>As<sub>4</sub>Mo<sub>12</sub></b>                                                    | RT         | 10         | DMC     | 56                     |
| 5     | (NH <sub>4</sub> ) <sub>6</sub> Mo <sub>7</sub> O <sub>24</sub> ·4H <sub>2</sub> O      | RT         | 10         | DMC     | 47                     |
| 6     | <i>p</i> -H <sub>2</sub> NC <sub>6</sub> H <sub>4</sub> AsO <sub>3</sub> H <sub>2</sub> | RT         | 10         | DMC     | 45                     |
| 7     | SeO <sub>2</sub>                                                                        | RT         | 10         | DMC     | 54                     |
| 8     | Mixture <sup>c</sup>                                                                    | RT         | 10         | DMC     | 51                     |
| 9     | —                                                                                       | RT         | 10         | DMC     | 28                     |

<sup>a</sup> Reaction conditions: *p*-toluenesulfonyl hydrazide **1a** (0.2 mmol), acetylacetone **2a** (0.2 mmol), catalyst (1.5 mol%), and DMC (0.5 mL) at RT for 10 min. <sup>b</sup> Yield was determined by GC with biphenyl as the internal standard. <sup>c</sup> The composition of the mixture is (NH<sub>4</sub>)<sub>6</sub>Mo<sub>7</sub>O<sub>24</sub>·4H<sub>2</sub>O (1.5 mol%), *p*-H<sub>2</sub>NC<sub>6</sub>H<sub>4</sub>AsO<sub>3</sub>H<sub>2</sub> (1.5 mol%) and SeO<sub>2</sub> (1.5 mol%).

**Table S5** Comparison of the catalytic efficiency of POM-based catalysts in the condensation-cyclization reactions of *p*-toluenesulfonyl hydrazide and acetylacetone

| Catalyst                                                                                                                                                                                                     | Conditions    | Catalyst Loading (mmol) | Yield (%) |
|--------------------------------------------------------------------------------------------------------------------------------------------------------------------------------------------------------------|---------------|-------------------------|-----------|
| $[\text{NaCo}_2\text{Mo}_2\text{O}_7(\text{OH})_3]_n$ <sup>S8</sup>                                                                                                                                          | 80 °C, 60 min | $2 \times 10^{-2}$      | 98        |
| $[\text{Cu}_3(\mu_3\text{-OH})(\text{tba})_3(\text{Htba})(\text{H}_2\text{O})_2(\text{HPMo}_{12}\text{O}_{40})] \cdot 7\text{H}_2\text{O}$ <sup>S9</sup><br>(Htba = 3-(4H-1,2,4-triazol-4-yl)-benzoic acid ) | 80 °C, 90 min | $1 \times 10^{-2}$      | 99        |
| $(\text{NH}_4)_7[(\text{SeO}_3)_2\text{Mo}_{12}\text{O}_{36}(\text{CH}_3\text{COO})_3]14\text{H}_2\text{O}$ <sup>S10</sup>                                                                                   | RT, 60 min    | $3 \times 10^{-3}$      | 99        |
| $(\text{NH}_4)_4[(\text{SeO}_3)_{1.3}(\text{HPO}_3)_{0.7}\text{Mo}_{12}\text{O}_{36}(\text{NH}_3\text{CH}_2\text{COO})_3]10\text{H}_2\text{O}$ <sup>S10</sup>                                                | RT, 60 min    | $3 \times 10^{-3}$      | 99        |
| $(\text{NH}_4)_4[(\text{SeO}_3)_{1.4}(\text{HPO}_3)_{0.6}\text{Mo}_{12}\text{O}_{36}(\text{L-NH}_3\text{C}_2\text{H}_3\text{OHCOO})_3]18\text{H}_2\text{O}$ <sup>S10</sup>                                   | RT, 60 min    | $3 \times 10^{-3}$      | 99        |
| $\text{Na}_3[\text{H}_{19}(\text{UO}_2)_2\text{O}(\text{Se}_2\text{W}_{14}\text{O}_{52})_2] \cdot 41\text{H}_2\text{O}$ <sup>S11</sup>                                                                       | 80 °C, 60 min | $2 \times 10^{-3}$      | 98        |
| $(\text{C}_2\text{H}_8\text{N})_{12}\text{Na}_2[\text{H}_{10}\{\text{Ce}(\text{H}_2\text{O})_5\}_2(\text{Te}_2\text{W}_{37}\text{O}_{132})] \cdot 39\text{H}_2\text{O}$ <sup>S12</sup>                       | 80 °C, 60 min | $1 \times 10^{-3}$      | 99        |
| $\text{Na}_{11}\text{H}(\text{H}_2\text{O})_{31}[\text{Na}(\text{UO}_2)(\text{A-PW}_9\text{O}_{34})_2] \cdot 7\text{H}_2\text{O}$ <sup>S13</sup>                                                             | 80 °C, 60 min | $1 \times 10^{-2}$      | 99        |
| <b>SeAs<sub>3</sub>Mo<sub>10</sub></b> (This Work)                                                                                                                                                           | RT, 90 min    | $3 \times 10^{-3}$      | 99        |
| <b>Se<sub>2</sub>As<sub>2</sub>Mo<sub>10</sub></b> (This Work)                                                                                                                                               | RT, 10 min    | $3 \times 10^{-3}$      | 99        |
| <b>Se<sub>2</sub>As<sub>6</sub>Mo<sub>20</sub>Ce<sub>2</sub></b> (This Work)                                                                                                                                 | RT, 40 min    | $3 \times 10^{-3}$      | 99        |

**Table S6** Acetalization of 2-aminobenzamide and benzaldehyde by different catalysts<sup>a</sup>

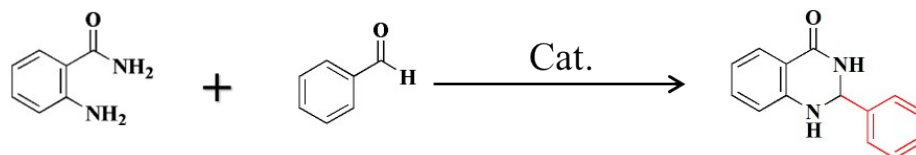

| Entry | Catalyst                                                                                                                                            | Conditions   | Catalyst             |                    | Yield <sup>b</sup><br>(%) |
|-------|-----------------------------------------------------------------------------------------------------------------------------------------------------|--------------|----------------------|--------------------|---------------------------|
|       |                                                                                                                                                     |              | Loading<br>(mmol)    | Solvent            |                           |
| 1     | —                                                                                                                                                   | 80 °C, 2 h   | —                    | CH <sub>3</sub> CN | 13                        |
| 2     | <b>SeAs<sub>3</sub>Mo<sub>10</sub></b>                                                                                                              | 80 °C, 2 h   | 3×10 <sup>-3</sup>   | CH <sub>3</sub> CN | 99                        |
| 3     | <b>Se<sub>2</sub>As<sub>2</sub>Mo<sub>10</sub></b>                                                                                                  | 80 °C, 1 h   | 3×10 <sup>-3</sup>   | CH <sub>3</sub> CN | 99                        |
| 4     | <b>Se<sub>2</sub>As<sub>6</sub>Mo<sub>20</sub>Ce<sub>2</sub></b>                                                                                    | 80 °C, 2 h   | 3×10 <sup>-3</sup>   | CH <sub>3</sub> CN | 99                        |
| 5     | <b>As<sub>4</sub>Mo<sub>12</sub></b>                                                                                                                | 80 °C, 2 h   | 3×10 <sup>-3</sup>   | CH <sub>3</sub> CN | 89                        |
| 6     | <b>SRMIST-1<sup>S14</sup></b>                                                                                                                       | Reflux, 10 h | 2.5×10 <sup>-3</sup> | EtOH               | 99                        |
| 7     | <b>Na<sub>3.3</sub>H<sub>2.7</sub>(H<sub>2</sub>O)<sub>9</sub>[Ni<sub>0.58</sub>UMo<sub>12</sub>O<sub>42</sub>]·4.5H<sub>2</sub>O<sup>S15</sup></b> | 80 °C, 9 h   | 6×10 <sup>-3</sup>   | CH <sub>3</sub> CN | 91                        |

<sup>a</sup> Reaction conditions: 2-aminobenzamide (0.2 mmol), benzaldehyde (0.2 mmol), catalyst (1.5 mol%), and acetonitrile (1.0 mL) at 80 °C and different reaction time. <sup>b</sup> Yield was determined by GC with biphenyl as the internal standard.

**Table S7** Crystal data and structure refinement for the as-made compounds

| Compound                                                                                                           | <b>SeAs<sub>3</sub>Mo<sub>10</sub></b>                                                               | <b>Se<sub>2</sub>As<sub>2</sub>Mo<sub>10</sub></b>                                                                 | <b>Se<sub>2</sub>As<sub>6</sub>Mo<sub>20</sub>Ce<sub>2</sub></b>                                                                     |
|--------------------------------------------------------------------------------------------------------------------|------------------------------------------------------------------------------------------------------|--------------------------------------------------------------------------------------------------------------------|--------------------------------------------------------------------------------------------------------------------------------------|
| Empirical formula                                                                                                  | SeAs <sub>3</sub> Mo <sub>10</sub> C <sub>18</sub> H <sub>63</sub> N <sub>6</sub><br>O <sub>56</sub> | Se <sub>2</sub> As <sub>2</sub> Mo <sub>10</sub> C <sub>12</sub> H <sub>52</sub> N <sub>6</sub><br>O <sub>52</sub> | Ce <sub>2</sub> Se <sub>2</sub> As <sub>6</sub> Mo <sub>20</sub> C <sub>36</sub> H <sub>136</sub> N <sub>6</sub><br>O <sub>129</sub> |
| Formula weight, g/mol                                                                                              | 2522.82                                                                                              | 2379.71                                                                                                            | 5523.91                                                                                                                              |
| Crystal system                                                                                                     | Orthorhombic                                                                                         | Triclinic                                                                                                          | Triclinic                                                                                                                            |
| Space group                                                                                                        | <i>Pbcn</i>                                                                                          | <i>P</i> -1                                                                                                        | <i>P</i> -1                                                                                                                          |
| <i>a</i> , Å                                                                                                       | 31.326(3)                                                                                            | 13.930(3)                                                                                                          | 12.1018(14)                                                                                                                          |
| <i>b</i> , Å                                                                                                       | 23.4652(19)                                                                                          | 20.189(5)                                                                                                          | 15.6636(19)                                                                                                                          |
| <i>c</i> , Å                                                                                                       | 24.275(2)                                                                                            | 24.369(6)                                                                                                          | 22.209(3)                                                                                                                            |
| $\alpha$ , °                                                                                                       | 90                                                                                                   | 91.991(7)                                                                                                          | 99.665(4)                                                                                                                            |
| $\beta$ , °                                                                                                        | 90                                                                                                   | 99.609(8)                                                                                                          | 94.683(4)                                                                                                                            |
| $\gamma$ , °                                                                                                       | 90                                                                                                   | 90.075(8)                                                                                                          | 108.620(4)                                                                                                                           |
| Volume, Å <sup>3</sup>                                                                                             | 17844(3)                                                                                             | 6753(3)                                                                                                            | 3891.5(8)                                                                                                                            |
| <i>Z</i>                                                                                                           | 8                                                                                                    | 2                                                                                                                  | 1                                                                                                                                    |
| <i>D</i> <sub>calc</sub> , g/cm <sup>3</sup>                                                                       | 1.637                                                                                                | 2.021                                                                                                              | 2.076                                                                                                                                |
| Absorption coefficient, mm <sup>-1</sup>                                                                           | 2.931                                                                                                | 3.550                                                                                                              | 3.941                                                                                                                                |
| <i>F</i> (000)                                                                                                     | 8248                                                                                                 | 3833                                                                                                               | 2270                                                                                                                                 |
| Theta range for data collection, °                                                                                 | 2.12 to 25.00                                                                                        | 2.16 to 25.00                                                                                                      | 2.40 to 28.38                                                                                                                        |
| Completeness to $\Theta_{\max}$                                                                                    | 99.9 %                                                                                               | 98.1 %                                                                                                             | 99.9 %                                                                                                                               |
| Index ranges                                                                                                       | -37<= <i>h</i> <=36<br>-27<= <i>k</i> <=27<br>-27<= <i>l</i> <=28                                    | -16<= <i>h</i> <=16<br>-23<= <i>k</i> <=24<br>-28<= <i>l</i> <=28                                                  | -16<= <i>h</i> <=16<br>-20<= <i>k</i> <=20<br>-29<= <i>l</i> <=29                                                                    |
| Reflections collected                                                                                              | 136137                                                                                               | 77446                                                                                                              | 87718                                                                                                                                |
| Independent reflections                                                                                            | 15705                                                                                                | 23326                                                                                                              | 19408                                                                                                                                |
| <i>R</i> (int)                                                                                                     | 0.2492                                                                                               | 0.0569                                                                                                             | 0.0579                                                                                                                               |
| Absorption correction                                                                                              | Semi-empirical from equivalents                                                                      | Semi-empirical from equivalents                                                                                    | Semi-empirical from equivalents                                                                                                      |
| Data / restraints / parameters                                                                                     | 15705 / 270 / 688                                                                                    | 23326 / 4298 / 1259                                                                                                | 19408 / 36 / 778                                                                                                                     |
| Goodness-of-fit on <i>F</i> <sup>2</sup>                                                                           | 1.078                                                                                                | 1.226                                                                                                              | 1.049                                                                                                                                |
| <i>R</i> <sub>1</sub> , <sup>[a]</sup> <i>wR</i> <sub>2</sub> <sup>[b]</sup> ( <i>I</i> > 2 $\sigma$ ( <i>I</i> )) | <i>R</i> <sub>1</sub> = 0.0619<br><i>wR</i> <sub>2</sub> = 0.1647                                    | <i>R</i> <sub>1</sub> = 0.1410<br><i>wR</i> <sub>2</sub> = 0.3559                                                  | <i>R</i> <sub>1</sub> = 0.0309<br><i>wR</i> <sub>2</sub> = 0.0724                                                                    |
| <i>R</i> <sub>1</sub> , <sup>[a]</sup> <i>wR</i> <sub>2</sub> <sup>[b]</sup> (all data)                            | <i>R</i> <sub>1</sub> = 0.0759<br><i>wR</i> <sub>2</sub> = 0.1721                                    | <i>R</i> <sub>1</sub> = 0.1878<br><i>wR</i> <sub>2</sub> = 0.3731                                                  | <i>R</i> <sub>1</sub> = 0.0422<br><i>wR</i> <sub>2</sub> = 0.0759                                                                    |
| Largest diff. peak and hole, e/Å <sup>3</sup>                                                                      | 1.875 and -1.870                                                                                     | 7.396 and -3.177                                                                                                   | 1.983 and -1.223                                                                                                                     |

<sup>[a]</sup>  $R_1 = \sum ||F_o| - |F_c|| / \sum |F_o|$ . <sup>[b]</sup>  $wR_2 = [\sum w(F_o^2 - F_c^2)^2 / \sum w(F_o^2)^2]^{1/2}$ .

## References

- S1 G. M. Sheldrick, *Acta Cryst.*, 2015, **C71**, 3–8.
- S2 G. M. Sheldrick, *Acta Cryst.*, 2008, **A64**, 112–122.
- S3 O. V. Dolomanov, L. J. Bourhis, R. J. Gildea, J. A. K. Howard and H. Puschmann, *J. Appl. Cryst.*, 2009, **42**, 339–341.
- S4 A. L. Spek, *Acta Cryst.*, 2015, **C71**, 9–18.
- S5 M. J. Frisch, G. W. Trucks, H. B. Schlegel, G. E. Scuseria, M. A. Robb, J. R. Cheeseman, G. Scalmani, V. Barone, B. Mennucci, G. A. Petersson, H. Nakatsuji, M. Caricato, X. Li, H. P. Hratchian, A. F. Izmaylov, J. Bloino, G. Zheng, J. Hasegawa, M. Ishida, T. Nakajima, Y. Honda, O. Kitao, H. Nakai, T. Vreven, J. A. Montgomery Jr, J. E. Peralta, F. Ogliaro, M. Bearpark, J. J. Heyd, E. Brothers, K. N. Kudin, V. N. Staroverov, R. Kobayashi, J. Normand, K. Raghavachari, A. Rendell, J. C. Burant, S. S. Iyengar, J. Tomasi, M. Cossi, N. Rega, J. M. Millam, M. Klene, J. E. Knox, J. B. Cross, V. Bakken, C. Adamo, J. Jaramillo, R. Gomperts, R. E. Stratmann, O. Yazyev, A. J. Austin, R. Cammi, C. Pomelli, J. W. Ochterski, R. L. Martin, K. Morokuma, V. G. Zakrzewski, G. A. Voth, P. Salvador, J. J. Dannenberg, S. Dapprich, A. D. Daniels, O. Farkas, J. B. Foresman, J. V. Ortiz, J. Cioslowski and D. J. Fox, Gaussian09W, Revision A02, Gaussian, Inc., Wallingford, CT, 2009.
- S6 (a) A. D. Becke, *J. Chem. Phys.*, 1993, **98**, 5648; (b) C. Lee, W. Yang and R. G. Parr, *Phys. Rev. B: Condens. Matter Mater. Phys.*, 1988, **37**, 785.
- S7 J. Tomasi, B. Mennucci and R. Cammi, *Chem. Rev.*, 2005, **105**, 2999–3094.
- S8 G. Yang, Y. Liu, X. Lin, B. Ming, K. Li and C. Hu, *Chin. Chem. Lett.*, 2022, **33**, 354–357.
- S9 K. Li, Y.-F. Liu, X.-L. Lin and G.-P. Yang, *Inorg. Chem.*, 2022, **61**, 6934–6942.
- S10 L.-L. Liu, Y.-H. Wang, X.-Y. Xiao, K.-W. Tong, Y. Zhao, C.-Q. Chen, J. Du and P. Yang, *Rare Met.*, 2023, **42**, 3345–3353.
- S11 M. Cheng, Y. Liu, W. Du, J. Shi, J. Li, H. Wang, K. Li, G. Yang and D. Zhang, *Chin. Chem. Lett.*, 2022, **33**, 3899–3902.
- S12 G.-P. Yang, S.-X. Shang, B. Yu and C.-W. Hu, *Inorg. Chem. Front.*, 2018, **5**, 2472–2477.
- S13 G.-P. Yang, X.-L. Zhang, Y.-F. Liu, D.-D. Zhang, K. Li and C.-W. Hu, *Inorg. Chem. Front.*, 2021, **8**, 4650–4656.
- S14 V. Jeevananthan, G. C. Senadi, K. Muthu, A. Arumugam and S. Shanmugan, *Inorg. Chem.*, 2024, **63**, 5446–5463.
- S15 K. Li, Y. F. Liu, G. P. Yang, Z. J. Zheng, X. L. Lin, Z. B. Zhang, S. J. Li, Y. H. Liu and Y. G. Wei, *Green Chem.*, 2024, **26**, 6454–6460.
